# Supplementary material for: Macrocyclic pentamers functionalised around their periphery as potential building blocks
Source: Royal Society of Chemistry journal article supplement (doi:10.1039/c8ra10446h), 2019-01-01
Supplement: c8ra10446h1.pdf [file c8ra10446h1.pdf]

# Macrocyclic pentamers functionalised around their periphery as potential building blocks

Seong Nam,<sup>a</sup> David C. Ware,<sup>a</sup> Penelope J. Brothers<sup>\*abc</sup>

<sup>a</sup>School of Chemical Sciences, University of Auckland, Private Bag 92019, Auckland 1142, New Zealand

<sup>b</sup>MacDiarmid Institute for Advanced Materials and Nanotechnology, New Zealand

<sup>c</sup>Research School of Chemistry, Australian National University, Canberra 2601, Australia.

## Table of contents

|                                                                                           |    |
|-------------------------------------------------------------------------------------------|----|
| Fig S1 <sup>1</sup> H NMR spectrum of <b>8</b> in CDCl <sub>3</sub>                       | 2  |
| Fig S2 <sup>13</sup> C NMR spectrum of <b>8</b> in CDCl <sub>3</sub>                      | 2  |
| Fig S3 <sup>1</sup> H NMR spectrum of <b>9</b> in CDCl <sub>3</sub>                       | 3  |
| Fig S4 <sup>13</sup> C NMR spectrum of <b>9</b> in CDCl <sub>3</sub>                      | 3  |
| Fig S5 <sup>1</sup> H NMR spectrum of <b>10</b> in CDCl <sub>3</sub>                      | 4  |
| Fig S6 <sup>13</sup> C NMR spectrum of <b>10</b> in CDCl <sub>3</sub>                     | 4  |
| Fig S7 <sup>1</sup> H NMR spectrum of <b>11</b> in DMSO-d <sub>6</sub>                    | 5  |
| Fig S8 <sup>13</sup> C NMR spectrum of <b>11</b> in DMSO-d <sub>6</sub>                   | 5  |
| Fig S9 <sup>1</sup> H NMR spectrum of <b>12</b> in CDCl <sub>3</sub>                      | 6  |
| Fig S10 <sup>13</sup> C NMR spectrum of <b>12</b> in CDCl <sub>3</sub>                    | 6  |
| FigS 11 <sup>1</sup> H NMR spectrum of <b>1</b> in CDCl <sub>3</sub>                      | 7  |
| Fig S12 <sup>13</sup> C NMR spectrum of <b>1</b> in CDCl <sub>3</sub>                     | 7  |
| Fig S13 COSY spectrum of <b>1</b> in CDCl <sub>3</sub>                                    | 9  |
| Fig S14 HSQC spectrum of <b>1</b> in CDCl <sub>3</sub>                                    | 10 |
| Fig S15 HMBC spectrum of <b>1</b> in CDCl <sub>3</sub>                                    | 10 |
| Fig S16 <sup>1</sup> H NMR spectrum of <b>3</b> in DMSO-d <sub>6</sub>                    | 11 |
| Fig S17 ESI-MS of <b>8</b>                                                                | 12 |
| Fig S18 ESI-MS of <b>9</b>                                                                | 12 |
| Fig S19 ESI-MS of <b>9</b>                                                                | 13 |
| Fig S20 ESI-MS of <b>10</b>                                                               | 13 |
| Fig S21 ESI-MS of <b>11</b>                                                               | 14 |
| Fig S22 ESI-MS of <b>12</b>                                                               | 14 |
| Fig S23 ESI-MS of <b>1</b>                                                                | 15 |
| Fig S24 ESI-MS of <b>2</b>                                                                | 15 |
| Fig S25 ESI-MS of <b>3</b>                                                                | 16 |
| Fig S26 UV-Vis spectrum of <b>8</b> (2.7 x 10 <sup>-4</sup> mol.L <sup>-1</sup> in DMSO)  | 16 |
| Fig S27 UV-Vis spectrum of <b>11</b> (9.1 x 10 <sup>-4</sup> mol.L <sup>-1</sup> in DMSO) | 17 |
| Fig S28 UV-Vis spectrum of <b>12</b> (9.7 x 10 <sup>-4</sup> mol.L <sup>-1</sup> in DMSO) | 17 |
| Fig S29 UV-Vis spectrum of <b>1</b> (2.6 x 10 <sup>-5</sup> mol.L <sup>-1</sup> in DMSO)  | 18 |
| Fig S30 UV-Vis spectrum of <b>3</b> (7.3 x 10 <sup>-5</sup> mol.L <sup>-1</sup> in DMSO)  | 18 |
| Fig S31 IR spectrum of <b>8</b>                                                           | 19 |
| Fig S32 IR spectrum of <b>11</b>                                                          | 19 |
| Fig S33 IR spectrum of <b>12</b>                                                          | 20 |
| Fig S34 IR spectrum of <b>1</b>                                                           | 20 |
| Fig S35 IR spectrum of <b>3</b>                                                           | 21 |

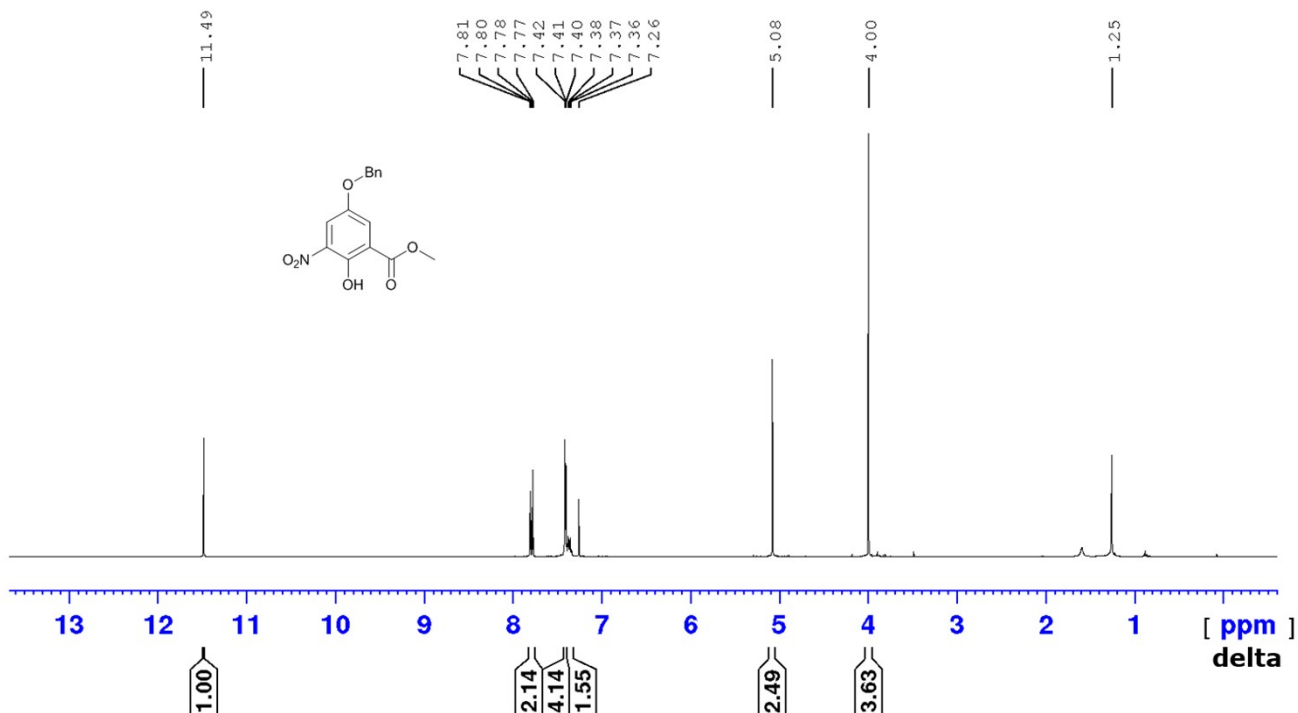

Fig S1  $^1\text{H NMR}$  spectrum of **8** in  $\text{CDCl}_3$

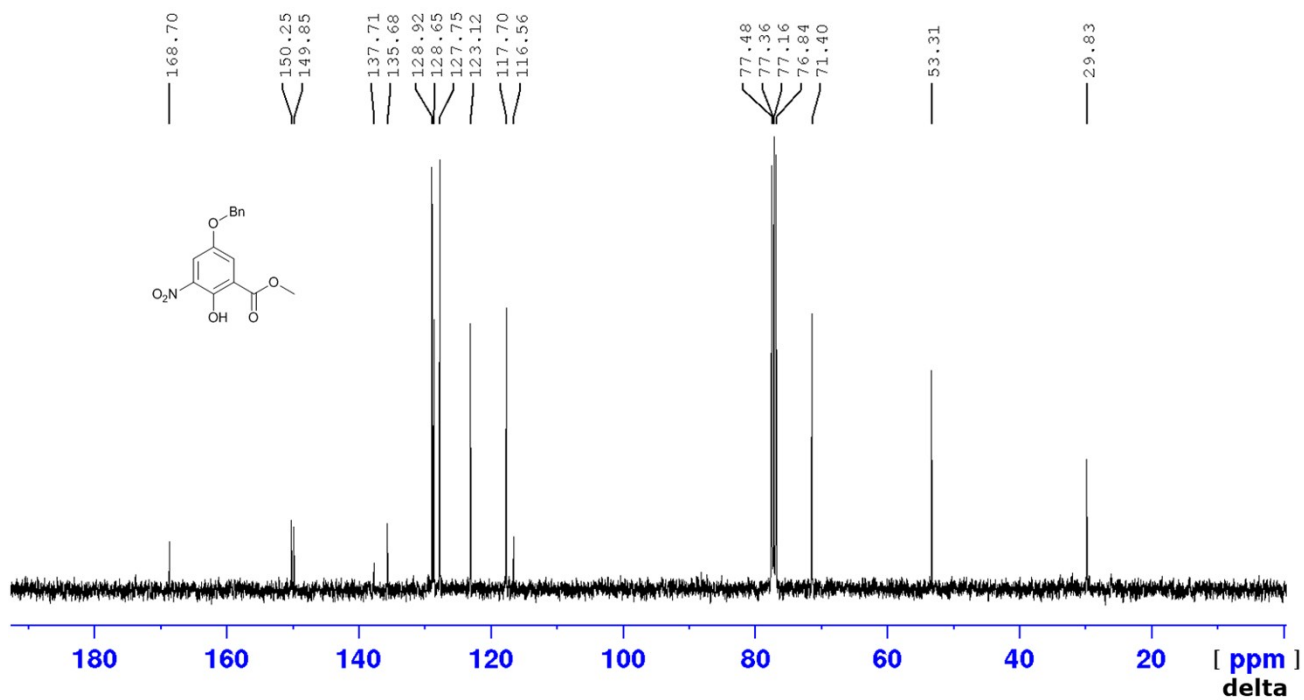

Fig S2  $^{13}\text{C NMR}$  spectrum of **8** in  $\text{CDCl}_3$

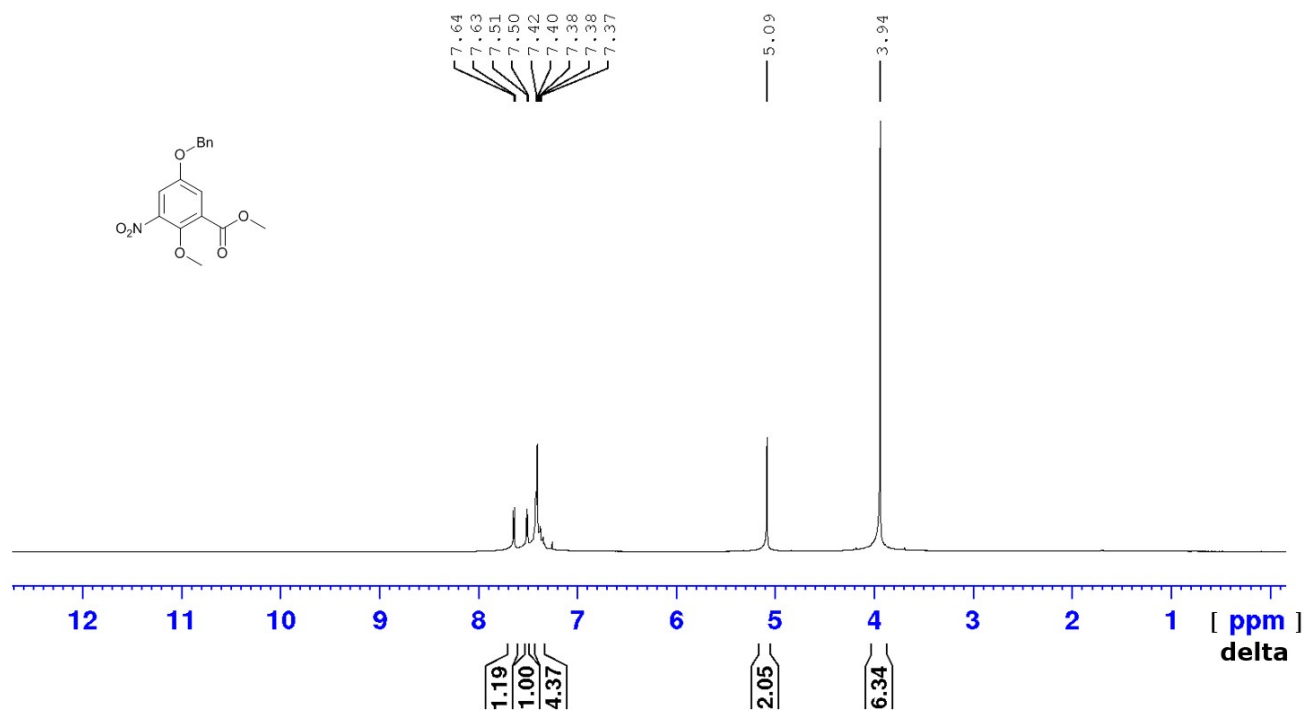

Fig S3 <sup>1</sup>H NMR spectrum of **9** in CDCl<sub>3</sub>

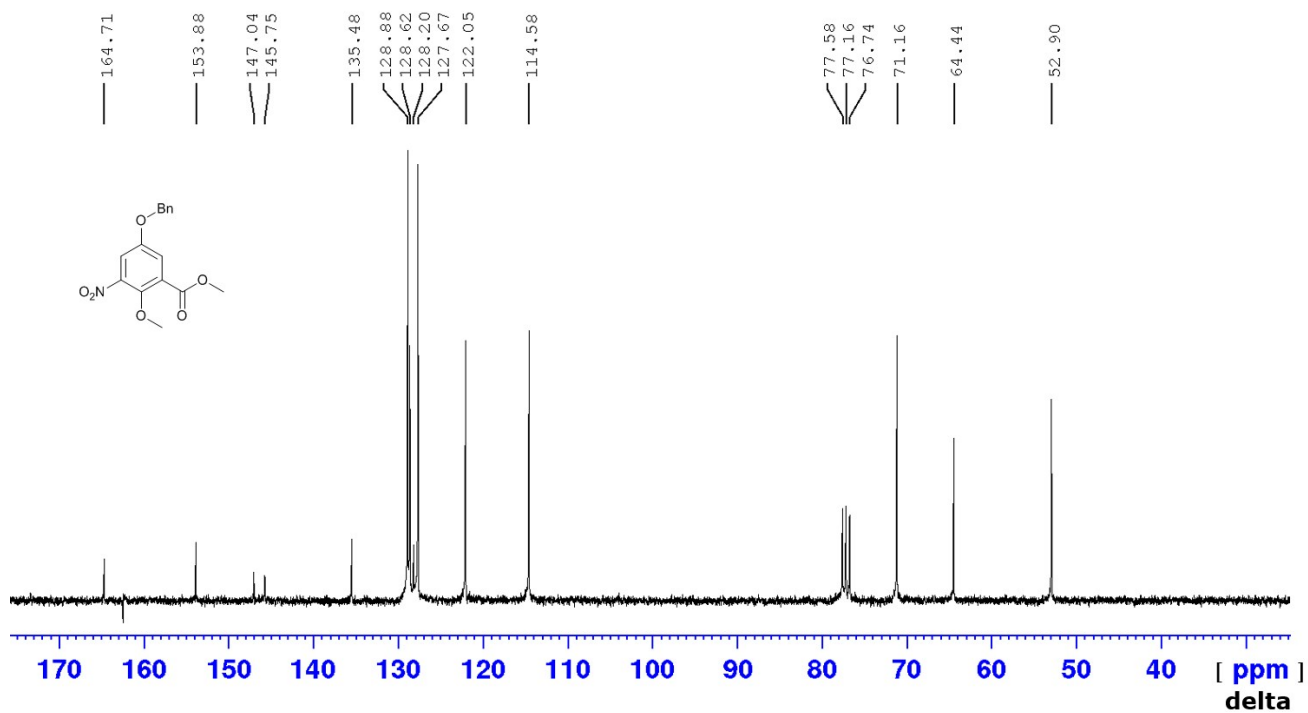

Fig S4 <sup>13</sup>C NMR spectrum of **9** in CDCl<sub>3</sub>

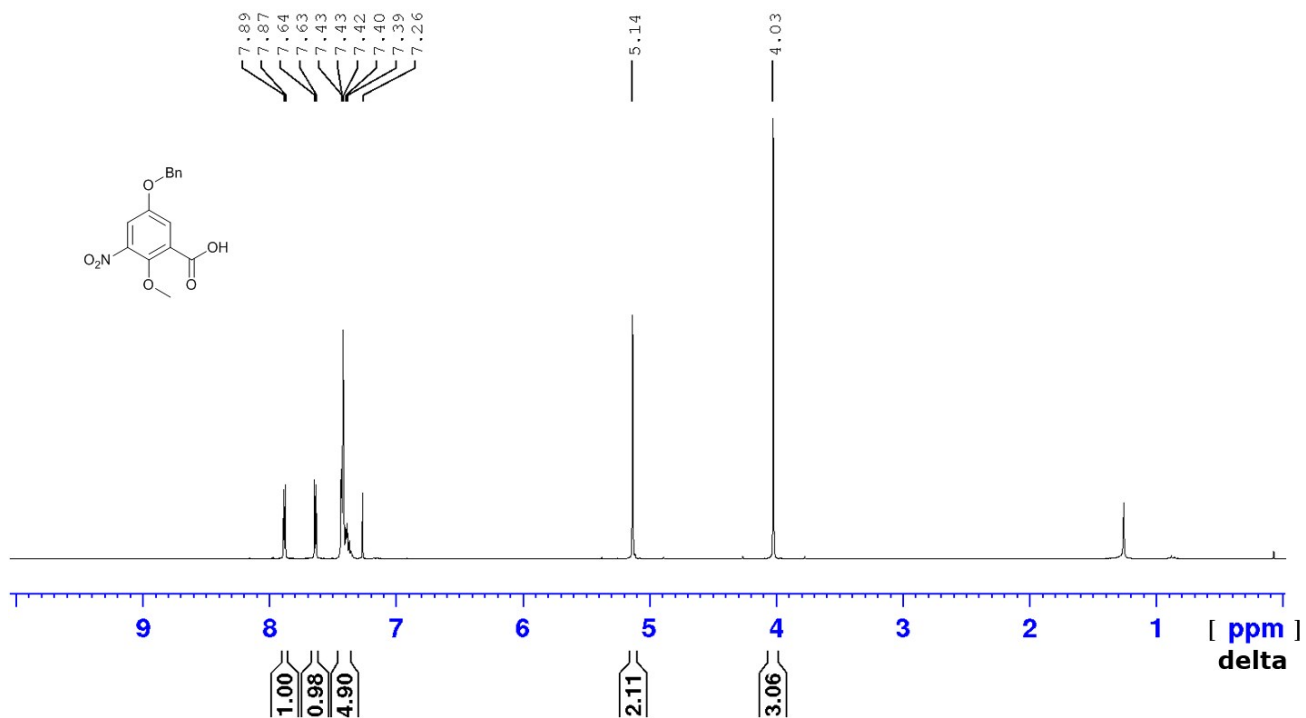

Fig S5 <sup>1</sup>H NMR spectrum of **10** in CDCl<sub>3</sub>

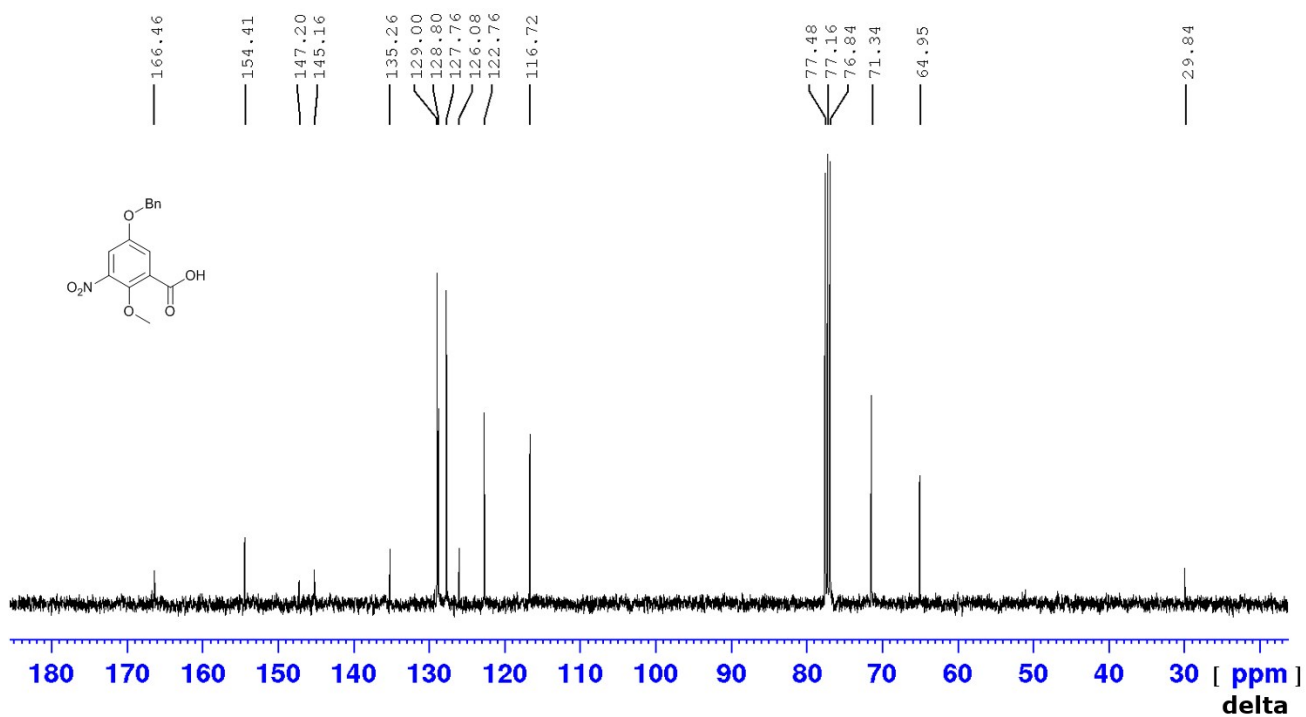

Fig S6 <sup>13</sup>C NMR spectrum of **10** in CDCl<sub>3</sub>

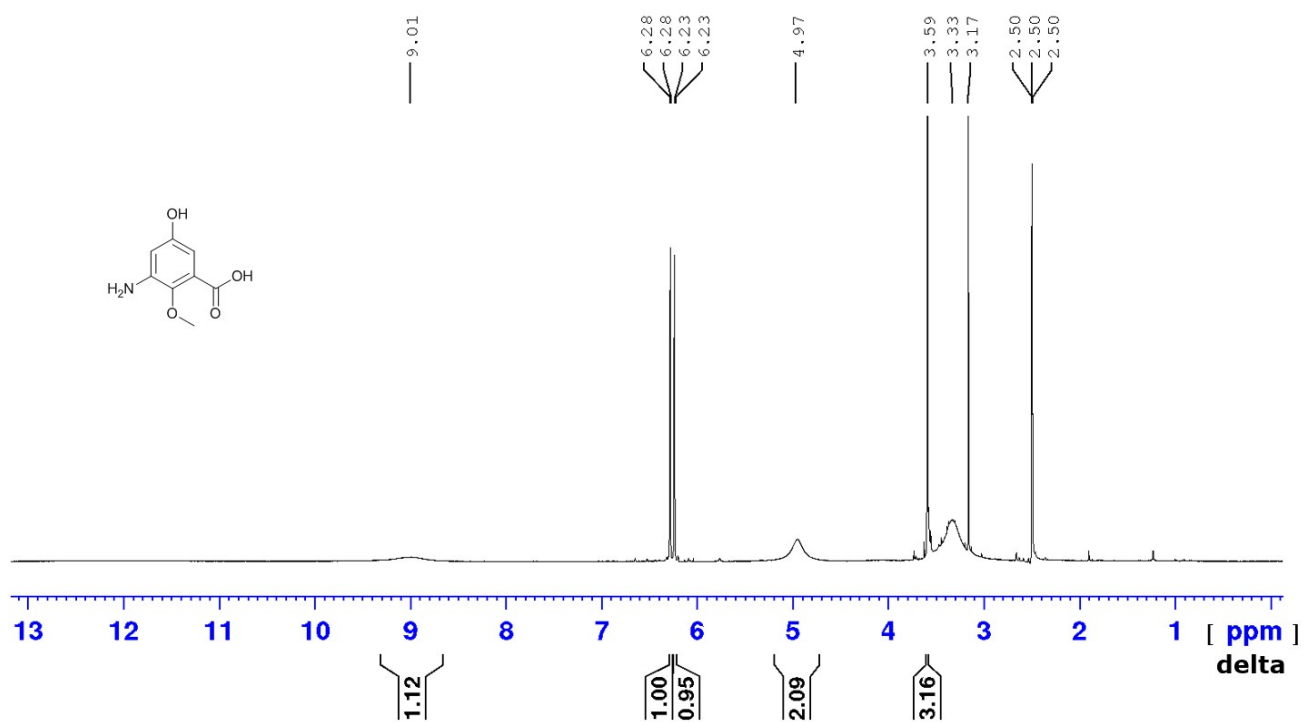

Fig S7 <sup>1</sup>H NMR spectrum of **11** in DMSO-*d*<sub>6</sub>

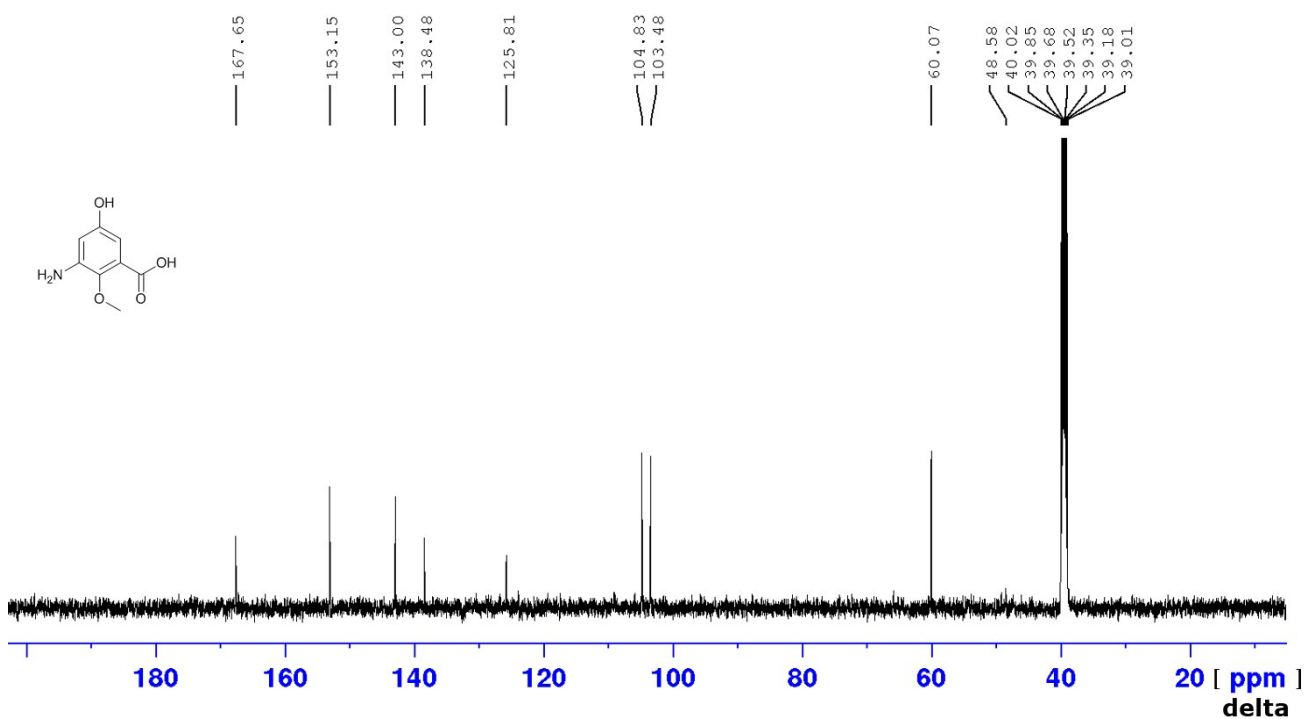

Fig S8 <sup>13</sup>C NMR spectrum of **11** in DMSO-*d*<sub>6</sub>

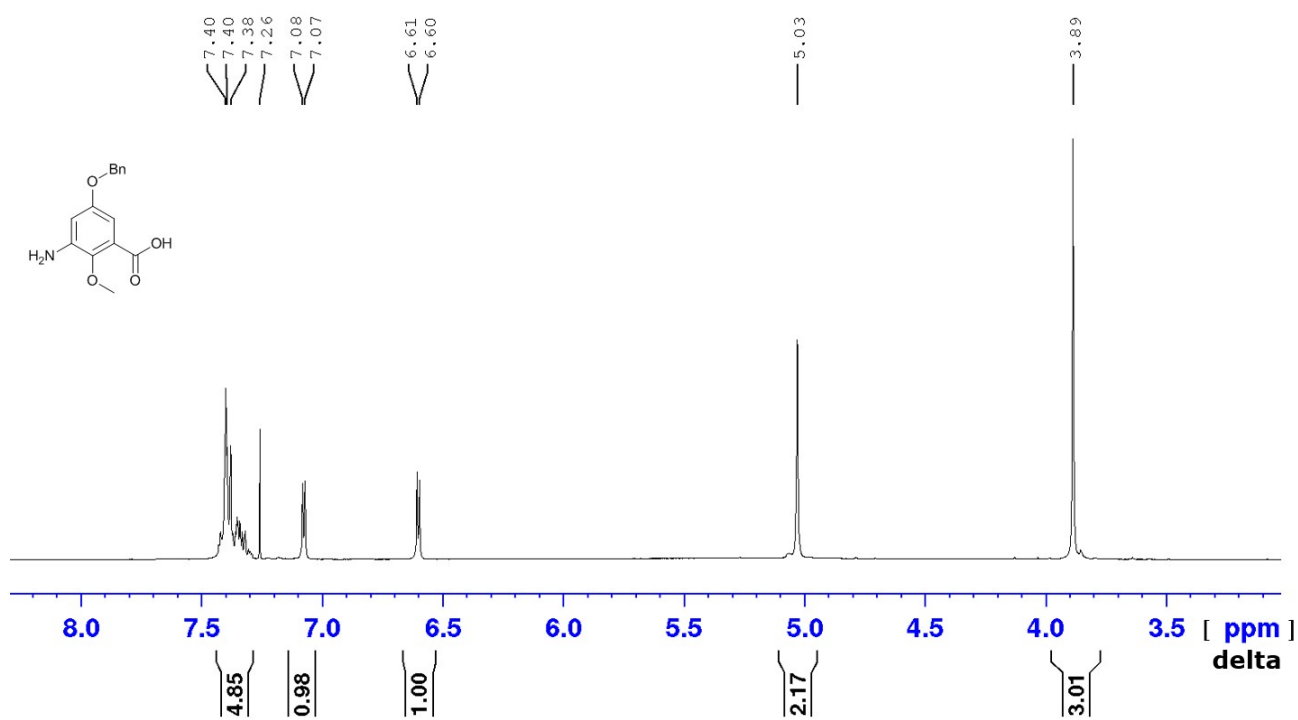

Fig S9  $^1\text{H}$  NMR spectrum of **12** in  $\text{CDCl}_3$

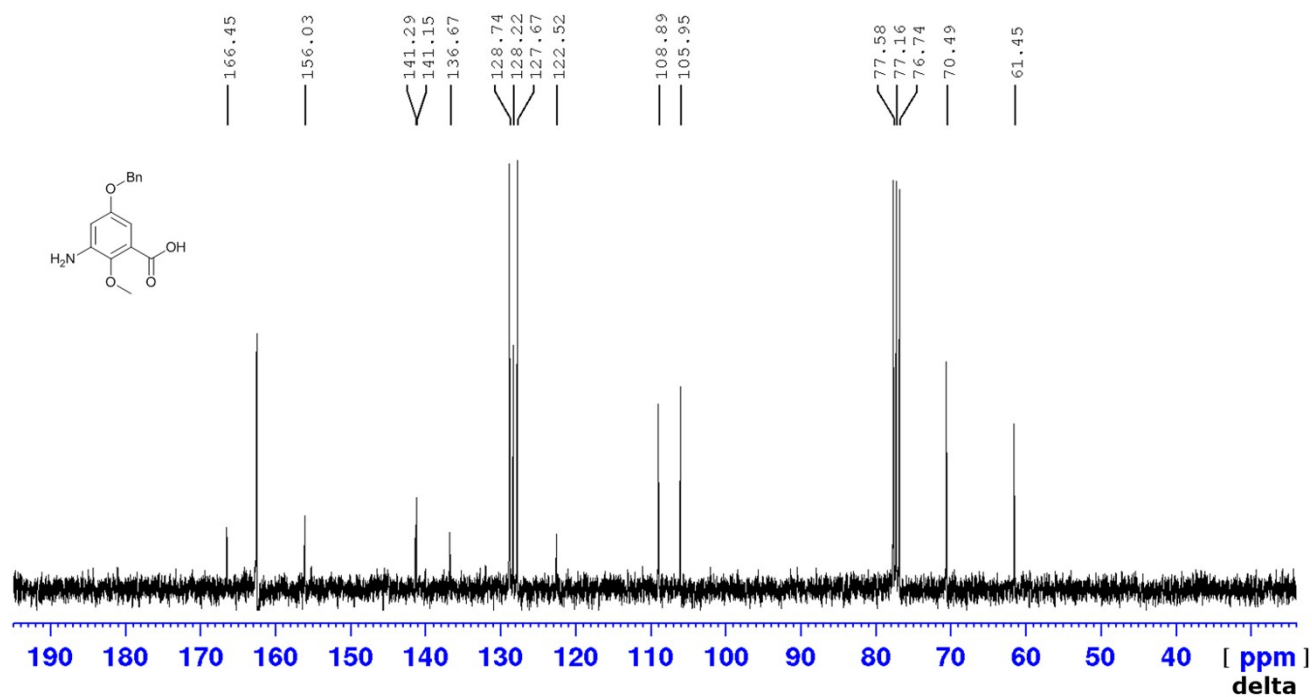

Fig S10  $^{13}\text{C}$  NMR spectrum of **12** in  $\text{CDCl}_3$

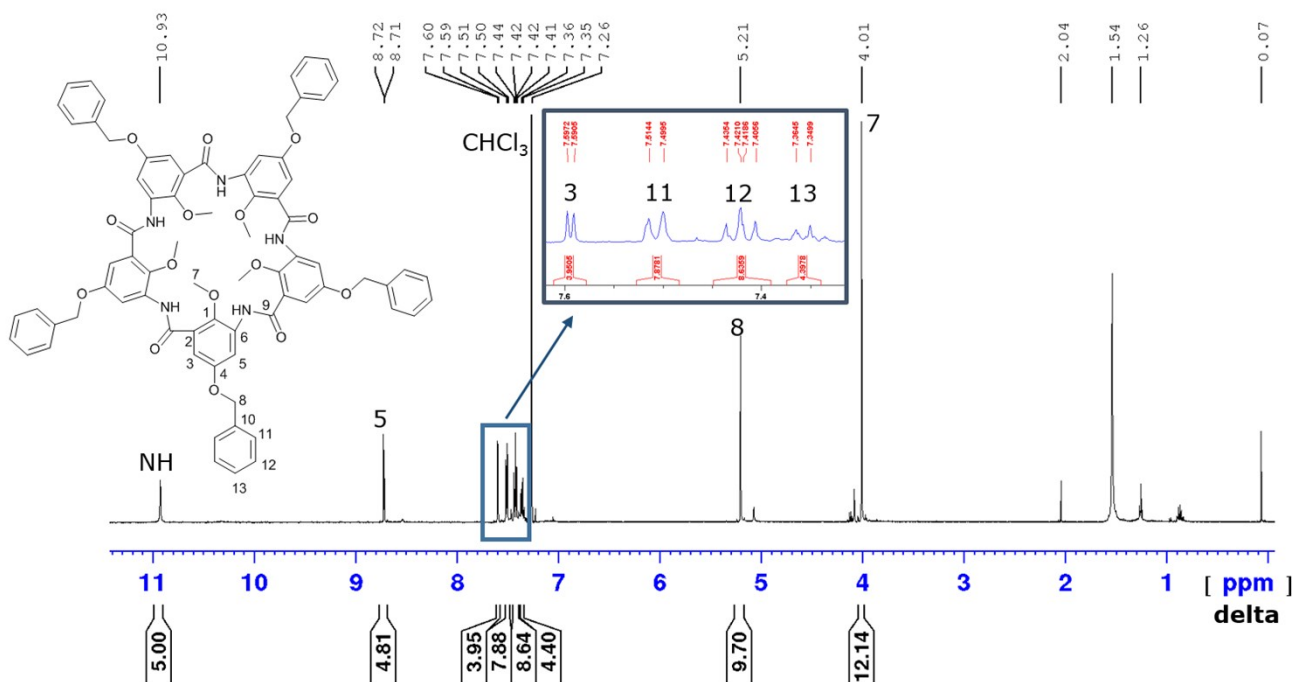

FigS 11  $^1\text{H}$  NMR spectrum of **1** in  $\text{CDCl}_3$

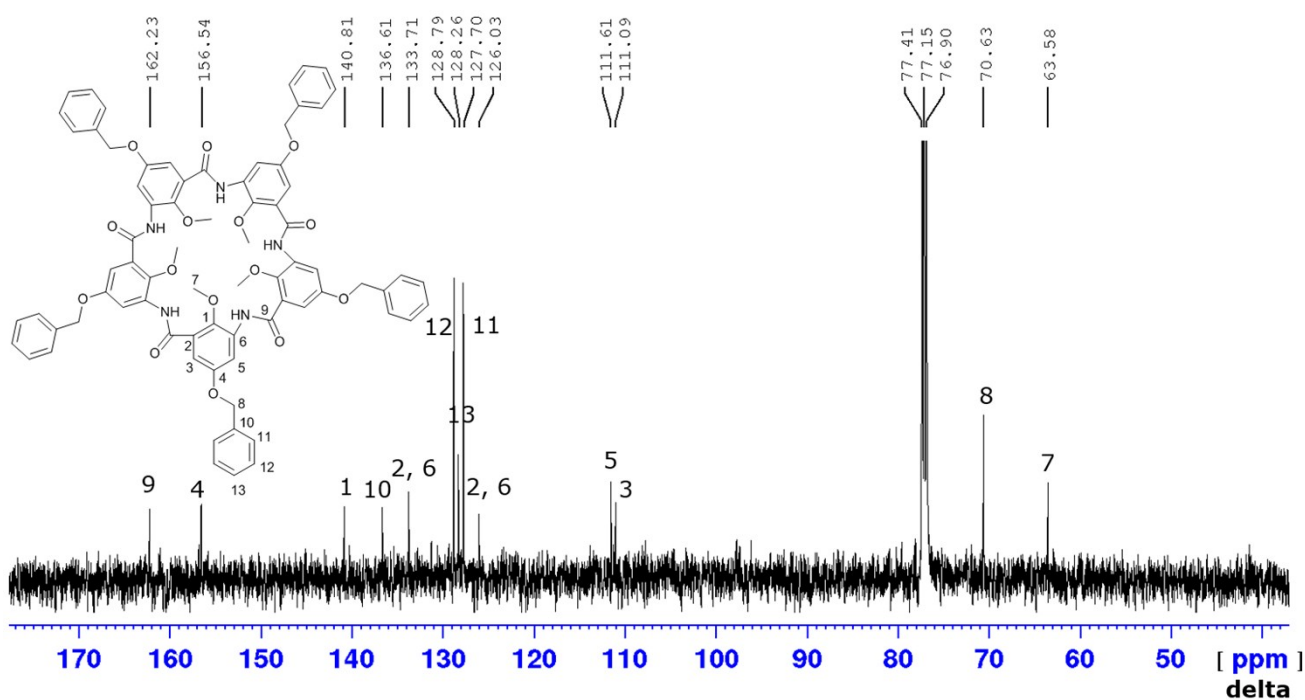

Fig S12  $^{13}\text{C}$  NMR spectrum of **1** in  $\text{CDCl}_3$

**1** was symmetric since only eight sets of signals were observed in  $^1\text{H}$  NMR spectrum. Assignments were achieved via the following steps. First, the proton signals of NH and H7 for the amide and internal methoxy could be assigned unambiguously to the

singlets at 10.93 ppm and 4.01 ppm by comparison with the peaks for all the other amide and internal methoxy protons of other methoxy pentamers which were observed between 10.8 – 11.0 ppm and 4.10 – 4.00 ppm, respectively.<sup>1, 2</sup> The proton signal of H8 for the methylene of benzyl could also be assigned unambiguously to the singlet at 5.20 ppm due to peaks for all the protons of benzyl-containing monomers (**8**, **9**, **10** and **12**) observed between 5.02 – 5.13 ppm. The integrations for Ha, H7 and H8 also matched 5, 10 and 15 protons, respectively. The carbon signal at 162.22 ppm could also be assigned unambiguously to C9 by comparison with the carbonyl carbons of other methoxy pentamers observed between 162.91 – 162.33 ppm.<sup>1, 2</sup> The carbon signals of C7 and C8 were assigned at 63.57 ppm and 70.62 ppm, respectively according to correlation in the HSQC spectrum. Based on integration of 5 protons and correlation in the COSY spectrum, the downfield doublet at 8.72 ppm was assigned to H3 or H5 and the doublet at 7.59 ppm was definitely assigned to the other pair. According to correlation between the carbon signal of C9 and the proton signal of H3 in the HMBC spectrum, the 63 doublets at 8.72 ppm and 7.59 ppm were assigned to H5 and H3, respectively as correlation between C9 and H3 and no correlation between C9 and H5 were observed. Therefore, the other proton signal at 7.59 ppm could be assigned to H5. Based on the HSQC spectrum, the carbon signals at 111.09 ppm and 111.60 ppm could be assigned to C3 and C5, respectively and correlation between Ha and C5 in the HMBC spectrum also agreed. The proton signals in the aromatic region (7.5 ppm) could be assigned to the benzyl protons. Based on integration of 5H, the doublet at 7.36 ppm could be assigned to H13. The carbon signal of C13 was at 128.25 ppm according to correlation in the HSQC spectrum. The other doublet at 7.51 ppm could be assigned to H11 which was integrated 10 H. The carbon signal of C11 was at 127.70 ppm according to correlation in the HSQC spectrum. The remaining triplet at 7.43 ppm could be assigned to H12 which was also integrated 10 protons. The carbon signal of C12 was at 128.78 ppm according to correlation in the HSQC spectrum. The remaining quaternary carbons (C1, C2, C4, C6 and C10) were assigned according to the HMBC spectrum. Based on correlation between the signals of H3, H5 and H7 and the signal of C1, the carbon signal at 140.81 ppm could be assigned to C1. The carbon signal at 136.61 ppm was assigned to C10 due to correlation between the signals of H8 and H12 and the signal of C10. Based on correlation between the signals of H3, H5 and H8 and the signal of C4, the carbon signal at 156.54 ppm could be assigned to C4 although the correlation between the signals of H3 and H5 and the signal of C4 were insufficiently strong. The last two signals for quaternary carbons at 133.70 ppm and



126.02 ppm were C2 or C6. Due to no correlation signals observed in the HMBC spectrum, C2 and C6 could not be assigned.

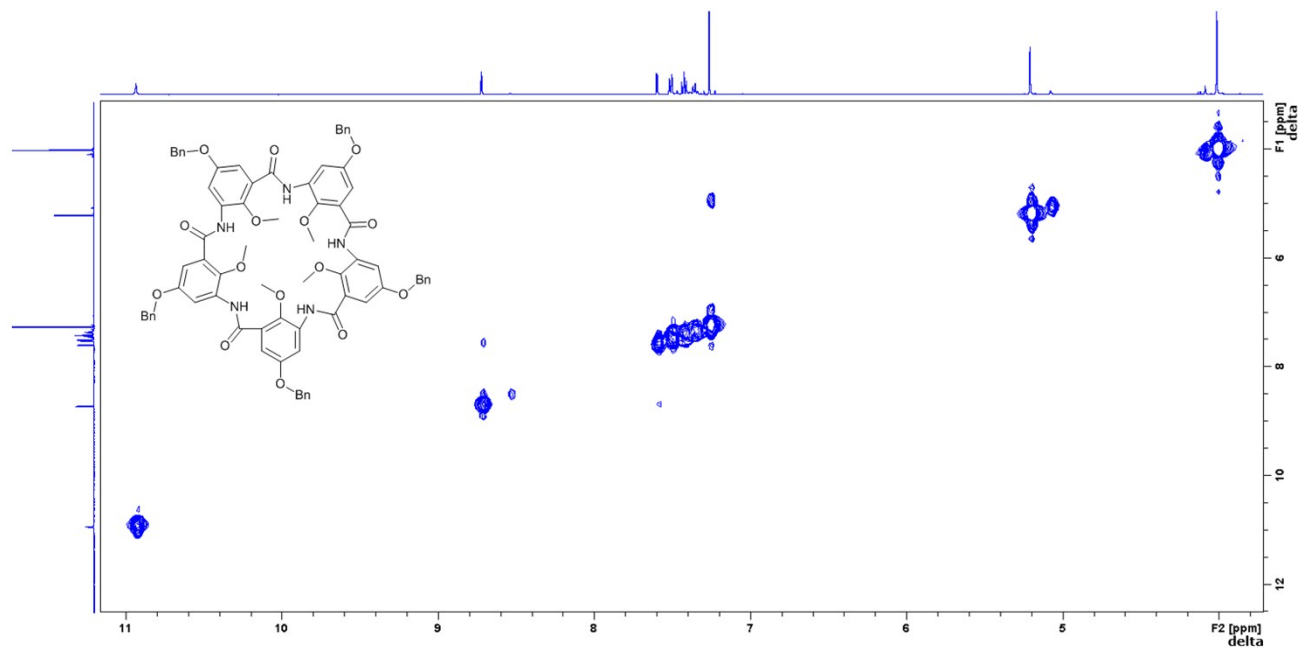

Fig S13 COSY spectrum of **1** in CDCl<sub>3</sub>

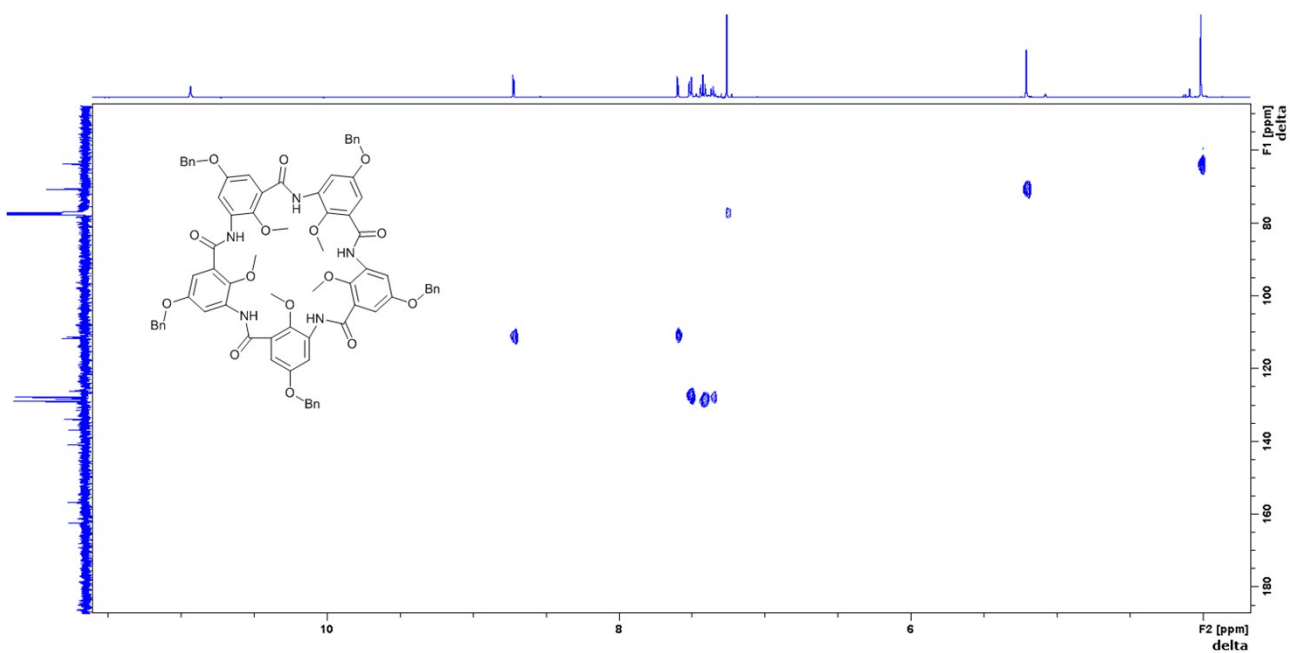

Fig S14 HSQC spectrum of **1** in CDCl<sub>3</sub>

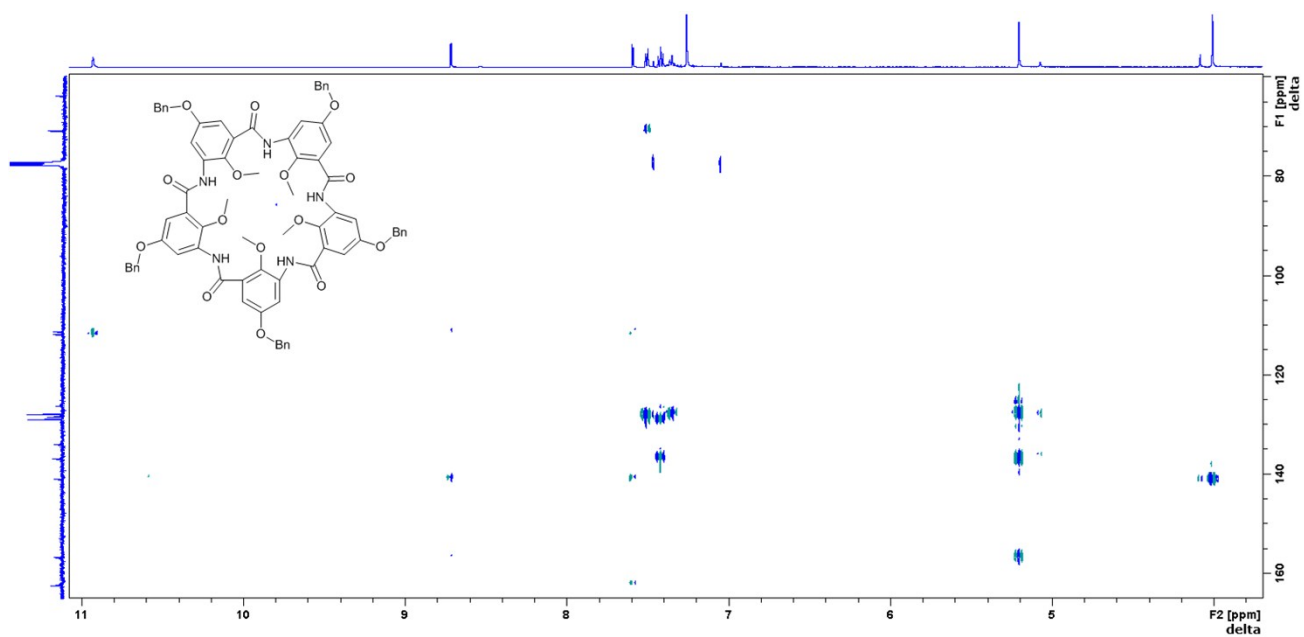

Fig S15 HMBC spectrum of **1** in CDCl<sub>3</sub>

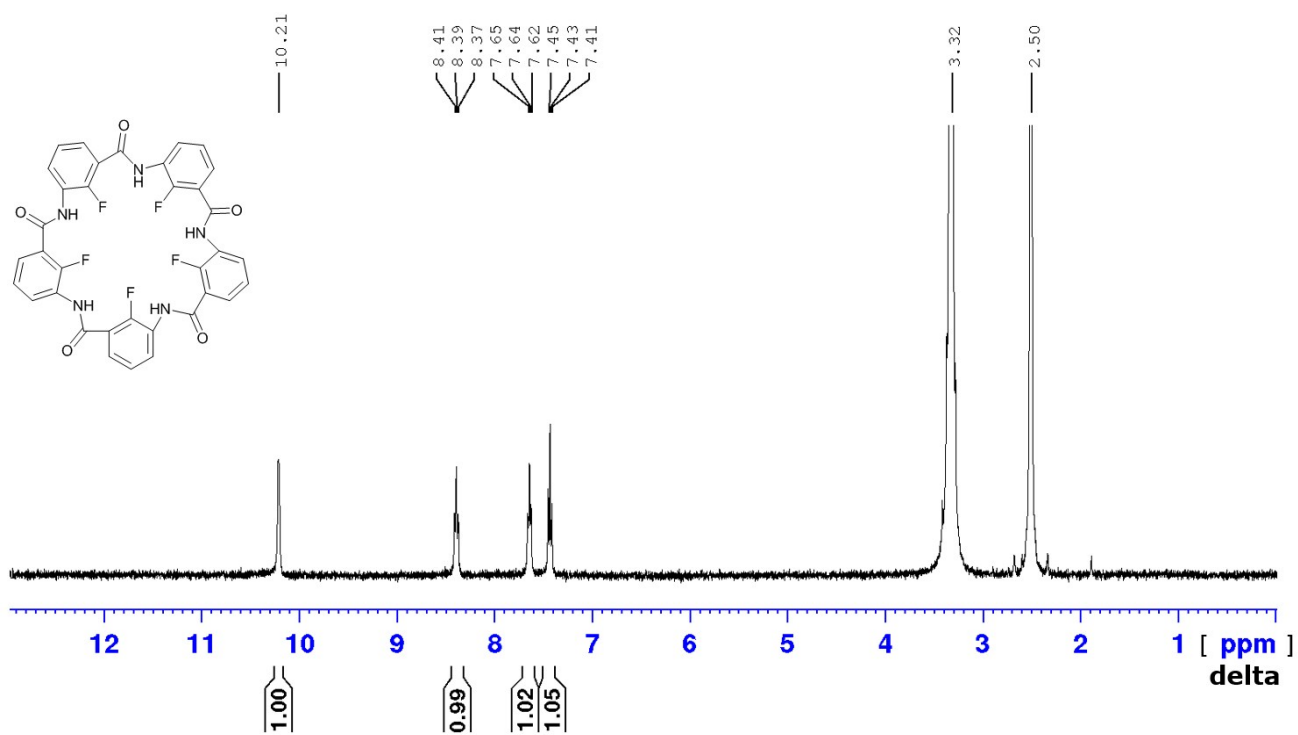

Fig S16 <sup>1</sup>H NMR spectrum of **3** in DMSO-*d*<sub>6</sub>

### Auckland Uni Mass Spectrum SmartFormula Report

|                                  |                                                             |                   |                         |  |
|----------------------------------|-------------------------------------------------------------|-------------------|-------------------------|--|
| <b>Analysis Info</b>             |                                                             | Acquisition Date  | 31/03/2014 6:00:24 p.m. |  |
| Analysis Name                    | D:\Data\AKid University\2014\Nick 03\14-03-31\Seong000005.d | Operator          | Nick                    |  |
| Method                           | 130822 - Low.m                                              | Instrument / Ser# | micrOTOF-Q 10191        |  |
| Sample Name                      | seong 159                                                   | Comment           |                         |  |
| Sample diluted 2uL in 1mL MeOH   |                                                             |                   |                         |  |
| Sample diluted 100uL in 1mL MeOH |                                                             |                   |                         |  |
| CCE = 4                          |                                                             |                   |                         |  |

|                              |            |                       |           |                  |           |
|------------------------------|------------|-----------------------|-----------|------------------|-----------|
| <b>Acquisition Parameter</b> |            |                       |           |                  |           |
| Source Type                  | ESI        | Ion Polarity          | Positive  | Set Nebulizer    | 0.4 Bar   |
| Focus                        | Not active | Set Capillary         | 4500 V    | Set Dry Heater   | 180 °C    |
| Scan Begin                   | 50 m/z     | Set End Plate Offset  | -500 V    | Set Dry Gas      | 4.0 l/min |
| Scan End                     | 1000 m/z   | Set Collision Cell RF | 150.0 Vpp | Set Divert Valve | Source    |

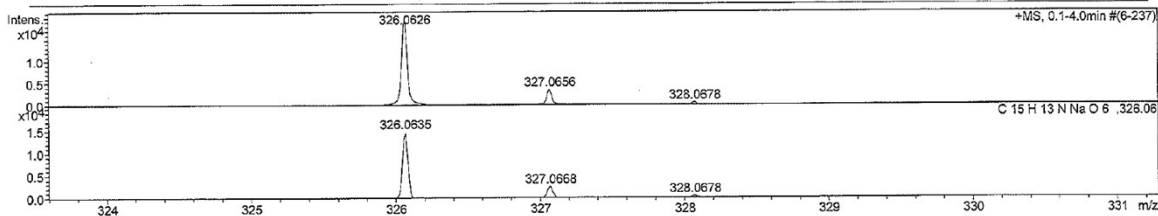

| Meas. m/z | # | Formula            | Score  | m/z      | err [mDa] | err [ppm] | mSigma | rdb | e <sup>-</sup> Conf | N-Rule |
|-----------|---|--------------------|--------|----------|-----------|-----------|--------|-----|---------------------|--------|
| 326.0626  | 1 | C 15 H 13 N Na O 6 | 100.00 | 326.0635 | 0.9       | 2.8       | 5.6    | 9.5 | even                | ok     |

**Fig S17 ESI-MS of 8**

### Auckland Uni Mass Spectrum SmartFormula Report

|                                |                                                             |                   |                         |  |
|--------------------------------|-------------------------------------------------------------|-------------------|-------------------------|--|
| <b>Analysis Info</b>           |                                                             | Acquisition Date  | 31/03/2014 5:18:24 p.m. |  |
| Analysis Name                  | D:\Data\AKid University\2014\Nick 03\14-03-31\Seong000001.d | Operator          | Nick                    |  |
| Method                         | 130822 - Low.m                                              | Instrument / Ser# | micrOTOF-Q 10191        |  |
| Sample Name                    | seong 180                                                   | Comment           |                         |  |
| Sample diluted 2uL in 1ml MeOH |                                                             |                   |                         |  |
| CCE = 4                        |                                                             |                   |                         |  |

|                              |            |                       |           |                  |           |
|------------------------------|------------|-----------------------|-----------|------------------|-----------|
| <b>Acquisition Parameter</b> |            |                       |           |                  |           |
| Source Type                  | ESI        | Ion Polarity          | Positive  | Set Nebulizer    | 0.4 Bar   |
| Focus                        | Not active | Set Capillary         | 4500 V    | Set Dry Heater   | 180 °C    |
| Scan Begin                   | 50 m/z     | Set End Plate Offset  | -500 V    | Set Dry Gas      | 4.0 l/min |
| Scan End                     | 1000 m/z   | Set Collision Cell RF | 150.0 Vpp | Set Divert Valve | Source    |

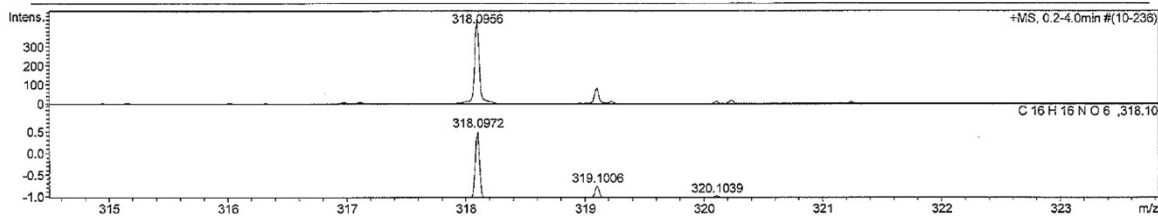

| Meas. m/z | # | Formula              | Score  | m/z      | err [mDa] | err [ppm] | mSigma | rdb  | e <sup>-</sup> Conf | N-Rule |
|-----------|---|----------------------|--------|----------|-----------|-----------|--------|------|---------------------|--------|
| 318.0955  | 1 | C 16 H 16 N O 6      | 100.00 | 318.0972 | 1.6       | 5.0       | 103.2  | 9.5  | even                | ok     |
|           | 2 | C 17 H 15 N 2 Na O 3 | 55.13  | 318.0975 | 1.9       | 5.8       | 111.2  | 11.0 | odd                 | ok     |

**Fig S18 ESI-MS of 9**

### Auckland Uni Mass Spectrum SmartFormula Report

|                      |                                                             |                         |
|----------------------|-------------------------------------------------------------|-------------------------|
| <b>Analysis Info</b> | Acquisition Date                                            | 31/03/2014 5:18:24 p.m. |
| Analysis Name        | D:\Data\Akid University\2014\Nick 03\14-03-31\Seong000001.d | Operator                |
| Method               | 130822 - Low.m                                              | Nick                    |
| Sample Name          | seong 160                                                   | Instrument / Ser#       |
| Comment              | Sample diluted 2uL in 1mL MeOH<br>CCE = 4                   | microTOF-Q 10191        |

|                              |            |                       |           |
|------------------------------|------------|-----------------------|-----------|
| <b>Acquisition Parameter</b> |            |                       |           |
| Source Type                  | ESI        | Ion Polarity          | Positive  |
| Focus                        | Not active | Set Capillary         | 4500 V    |
| Scan Begin                   | 50 m/z     | Set End Plate Offset  | -500 V    |
| Scan End                     | 1000 m/z   | Set Collision Cell RF | 150.0 Vpp |
|                              |            | Set Nebulizer         | 0.4 Bar   |
|                              |            | Set Dry Heater        | 180 °C    |
|                              |            | Set Dry Gas           | 4.0 l/min |
|                              |            | Set Divert Valve      | Source    |

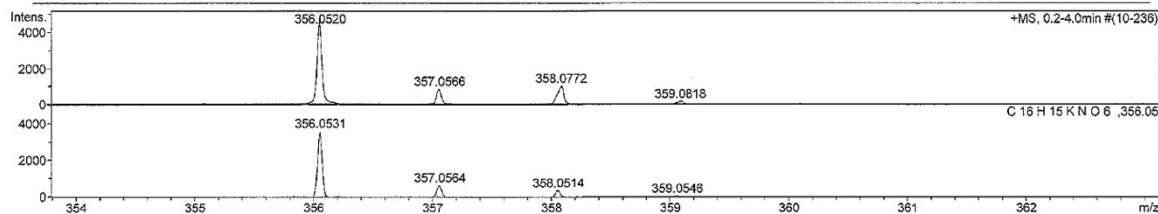

| Meas. m/z | # | Formula                | Score  | m/z      | err [mDa] | err [ppm] | mSigma | rdb  | e <sup>-</sup> Conf | N-Rule |
|-----------|---|------------------------|--------|----------|-----------|-----------|--------|------|---------------------|--------|
| 356.0520  | 1 | C 16 H 15 K N O 6      | 100.00 | 356.0531 | 1.1       | 3.1       | 82.4   | 9.5  | even                | ok     |
|           | 2 | C 17 H 14 K N 2 Na O 3 | 79.74  | 356.0534 | 1.4       | 3.9       | 84.0   | 11.0 | odd                 | ok     |
|           | 3 | C 18 H 12 O 8          | 18.52  | 356.0527 | 0.7       | 1.9       | 107.9  | 13.0 | odd                 | ok     |
|           | 4 | C 16 H 10 N 3 O 7      | 16.93  | 356.0513 | -0.7      | -1.8      | 110.1  | 13.5 | even                | ok     |
|           | 5 | C 19 H 11 N Na O 5     | 13.99  | 356.0529 | 1.0       | 2.7       | 110.5  | 14.5 | even                | ok     |
|           | 6 | C 17 H 9 N 4 Na O 4    | 17.23  | 356.0516 | -0.4      | -1.1      | 112.3  | 15.0 | odd                 | ok     |
|           | 7 | C 17 H 6 N 7 O 3       | 14.34  | 356.0527 | 0.7       | 1.9       | 112.9  | 18.5 | even                | ok     |
|           | 8 | C 18 H 5 N 8 Na        | 10.49  | 356.0529 | 1.0       | 2.7       | 116.0  | 20.0 | odd                 | ok     |

**Fig S19 ESI-MS of 9**

### Auckland Uni Mass Spectrum SmartFormula Report

|                      |                                                                           |                        |
|----------------------|---------------------------------------------------------------------------|------------------------|
| <b>Analysis Info</b> | Acquisition Date                                                          | 2/04/2014 1:04:27 p.m. |
| Analysis Name        | D:\Data\Akid University\2014\Nick 04\14-04-02\Seong000003.d               | Operator               |
| Method               | 130822 - Low.m                                                            | Nick                   |
| Sample Name          | seong 161                                                                 | Instrument / Ser#      |
| Comment              | Sample dissolved in 1mL MeOH<br>Sample diluted 2uL in 1mL MeOH<br>CCE = 8 | microTOF-Q 10191       |

|                              |            |                       |           |
|------------------------------|------------|-----------------------|-----------|
| <b>Acquisition Parameter</b> |            |                       |           |
| Source Type                  | ESI        | Ion Polarity          | Positive  |
| Focus                        | Not active | Set Capillary         | 4500 V    |
| Scan Begin                   | 50 m/z     | Set End Plate Offset  | -500 V    |
| Scan End                     | 1000 m/z   | Set Collision Cell RF | 150.0 Vpp |
|                              |            | Set Nebulizer         | 0.4 Bar   |
|                              |            | Set Dry Heater        | 180 °C    |
|                              |            | Set Dry Gas           | 4.0 l/min |
|                              |            | Set Divert Valve      | Source    |

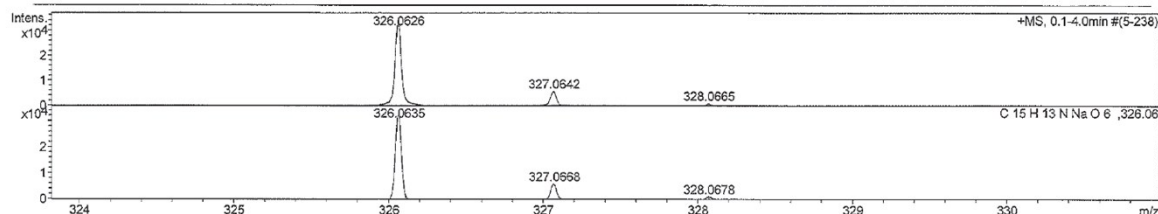

| Meas. m/z | # | Formula            | Score  | m/z      | err [mDa] | err [ppm] | mSigma | rdb | e <sup>-</sup> Conf | N-Rule |
|-----------|---|--------------------|--------|----------|-----------|-----------|--------|-----|---------------------|--------|
| 326.0626  | 1 | C 15 H 13 N Na O 6 | 99.19  | 326.0535 | 0.9       | 2.8       | 1.0    | 9.5 | even                | ok     |
|           | 2 | C 14 H 14 O 9      | 100.00 | 326.0632 | 0.6       | 2.0       | 9.0    | 8.0 | odd                 | ok     |

**Fig S20 ESI-MS of 10**

## Auckland Uni Mass Spectrum SmartFormula Report

|                                                                                 |                                            |
|---------------------------------------------------------------------------------|--------------------------------------------|
| <b>Analysis Info</b>                                                            | Acquisition Date                           |
| Analysis Name: C:\Bruker\Data\Tony14\Tony07\14-07-16\run1\seong162_RA4_01_403.d | 7/16/2014 1:17:53 PM                       |
| Method: may2014 - low - hplc.m                                                  | Operator: Tony                             |
| Sample Name: seong162                                                           | Instrument / Ser#: micrOTOF-Q 228888.10191 |
| Comment: Sample in 2mg/mL MeCN/MeOH<br>Sample diluted 5uL in 1mL MeOH           |                                            |

|                              |            |                       |           |                  |           |
|------------------------------|------------|-----------------------|-----------|------------------|-----------|
| <b>Acquisition Parameter</b> |            |                       |           |                  |           |
| Source Type                  | ESI        | Ion Polarity          | Positive  | Set Nebulizer    | 0.4 Bar   |
| Focus                        | Not active | Set Capillary         | 4500 V    | Set Dry Heater   | 180 °C    |
| Scan Begin                   | 50 m/z     | Set End Plate Offset  | -500 V    | Set Dry Gas      | 4.0 l/min |
| Scan End                     | 1000 m/z   | Set Collision Cell RF | 150.0 Vpp | Set Divert Valve | Waste     |

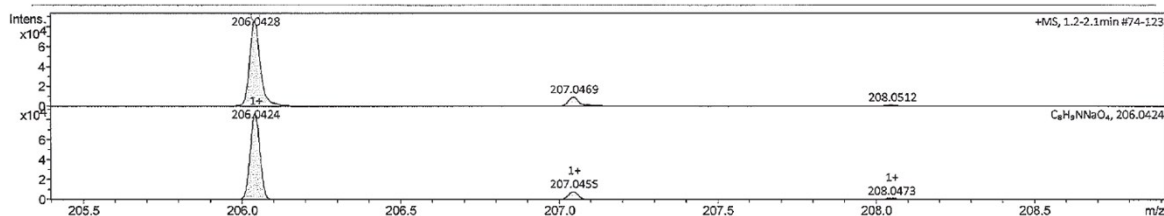

| Meas. m/z | # | Ion Formula | m/z      | err [ppm] | mSigma | # Sigma | Score  | rdb | e <sup>-</sup> Conf | N-Rule |
|-----------|---|-------------|----------|-----------|--------|---------|--------|-----|---------------------|--------|
| 206.0428  | 1 | C8H6N4O3    | 206.0434 | -3.3      | 6.3    | 1       | 100.00 | 8.0 | odd                 | ok     |
|           | 2 | C6H4N7O2    | 206.0421 | -3.2      | 12.9   | 2       | 89.85  | 8.5 | even                | ok     |
|           | 3 | C7H10O7     | 206.0421 | -3.2      | 18.7   | 3       | 80.07  | 3.0 | odd                 | ok     |
|           | 1 | C8H9NNaO4   | 206.0424 | -1.8      | 11.5   | 1       | 100.00 | 4.5 | even                | ok     |

Fig S21 ESI-MS of **11**

## Auckland Uni Mass Spectrum SmartFormula Report

|                                                                                   |                                            |
|-----------------------------------------------------------------------------------|--------------------------------------------|
| <b>Analysis Info</b>                                                              | Acquisition Date                           |
| Analysis Name: C:\Bruker\Data\Tony14\Tony09\14-09-08\run1\seong162-3_RA1_01_747.d | 9/8/2014 4:50:29 PM                        |
| Method: may2014 - low - hplc.m                                                    | Operator: Tony                             |
| Sample Name: seong162-3                                                           | Instrument / Ser#: micrOTOF-Q 228888.10191 |
| Comment: Sample dissolved in 1mL MeOH @ 2mg/mL<br>Sample diluted 3uL in 1mL MeOH  |                                            |

|                              |            |                       |           |                  |           |
|------------------------------|------------|-----------------------|-----------|------------------|-----------|
| <b>Acquisition Parameter</b> |            |                       |           |                  |           |
| Source Type                  | ESI        | Ion Polarity          | Positive  | Set Nebulizer    | 0.4 Bar   |
| Focus                        | Not active | Set Capillary         | 4500 V    | Set Dry Heater   | 180 °C    |
| Scan Begin                   | 50 m/z     | Set End Plate Offset  | -500 V    | Set Dry Gas      | 4.0 l/min |
| Scan End                     | 1000 m/z   | Set Collision Cell RF | 150.0 Vpp | Set Divert Valve | Waste     |

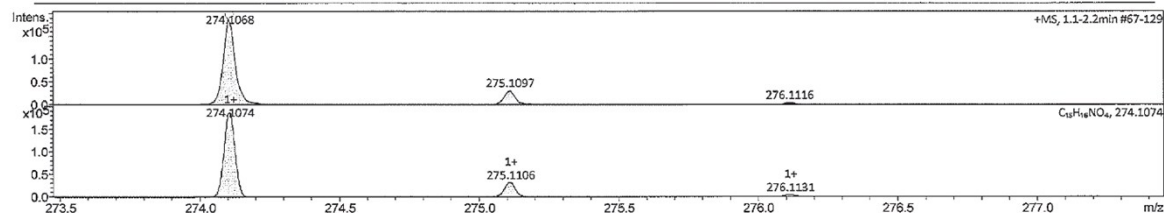

| Meas. m/z | # | Ion Formula | m/z      | err [ppm] | mSigma | # Sigma | Score  | rdb  | e <sup>-</sup> Conf | N-Rule |
|-----------|---|-------------|----------|-----------|--------|---------|--------|------|---------------------|--------|
| 274.1068  | 1 | C13H14N4O3  | 274.1060 | 2.6       | 3.4    | 1       | 95.31  | 9.0  | odd                 | ok     |
|           | 2 | C15H16NO4   | 274.1074 | 2.3       | 3.7    | 2       | 100.00 | 8.5  | even                | ok     |
|           | 1 | C13H14N4O3  | 274.1060 | 2.6       | 3.4    | 1       | 95.31  | 9.0  | odd                 | ok     |
|           | 2 | C15H16NO4   | 274.1074 | 2.3       | 3.7    | 2       | 100.00 | 8.5  | even                | ok     |
|           | 1 | C14H13N5Na  | 274.1063 | 1.6       | 6.3    | 1       | 100.00 | 10.5 | even                | ok     |
|           | 2 | C16H15N2NaO | 274.1077 | -3.3      | 11.4   | 2       | 72.51  | 10.0 | odd                 | ok     |

Fig S22 ESI-MS of **12**

### Auckland Uni Mass Spectrum SmartFormula Report

|                      |                                                     |                   |                         |
|----------------------|-----------------------------------------------------|-------------------|-------------------------|
| <b>Analysis Info</b> | C:\Bruker\Data\Tony14\Tony09\14-09-23\Seong000001.d | Acquisition Date  | 9/23/2014 10:43:49 AM   |
| Analysis Name        | May2014 high.m                                      | Operator          | Tony                    |
| Method               | seong 175-1                                         | Instrument / Ser# | micrOTOF-Q 228888.10191 |
| Sample Name          | Sample dissolved in MeCN @ 2mg/ml                   |                   |                         |
| Comment              | Sample diluted 3ul in 1ml MeCN                      |                   |                         |

|                              |          |                       |            |
|------------------------------|----------|-----------------------|------------|
| <b>Acquisition Parameter</b> |          |                       |            |
| Source Type                  | ESI      | Ion Polarity          | Positive   |
| Focus                        | Active   | Set Capillary         | 4500 V     |
| Scan Begin                   | 50 m/z   | Set End Plate Offset  | -500 V     |
| Scan End                     | 3000 m/z | Set Collision Cell RF | 1600.0 Vpp |
|                              |          | Set Nebulizer         | 0.4 Bar    |
|                              |          | Set Dry Heater        | 180 °C     |
|                              |          | Set Dry Gas           | 4.0 l/min  |
|                              |          | Set Divert Valve      | Waste      |

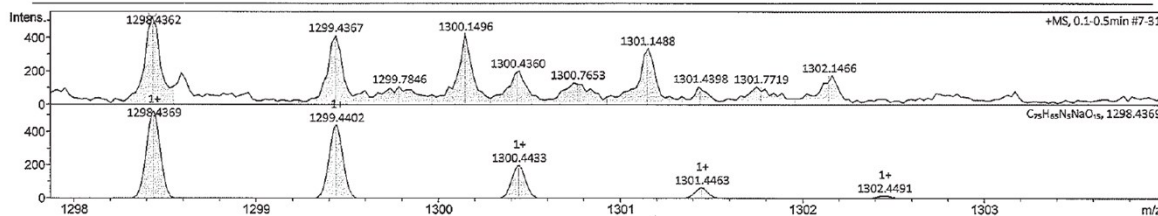

| Meas. m/z | # | Ion Formula   | m/z       | err [ppm] | mSigma | # Sigma | Score  | rdb  | e <sup>-</sup> Conf | N-Rule |
|-----------|---|---------------|-----------|-----------|--------|---------|--------|------|---------------------|--------|
| 1298.4362 | 1 | C75H85N5NaO15 | 1298.4369 | 0.6       | 42.5   | 1       | 100.00 | 45.5 | even                | ok     |

Fig S23 ESI-MS of 1

### Auckland Uni Mass Spectrum SmartFormula Report

|                      |                                                     |                   |                         |
|----------------------|-----------------------------------------------------|-------------------|-------------------------|
| <b>Analysis Info</b> | C:\Bruker\Data\Tony14\Tony11\14-11-05\seong000002.d | Acquisition Date  | 11/5/2014 11:47:04 AM   |
| Analysis Name        | May2014 Wide.m                                      | Operator          | Tony                    |
| Method               | seong185a                                           | Instrument / Ser# | micrOTOF-Q 228888.10191 |
| Sample Name          | Sample dissolved in 0.2ml MeOH                      |                   |                         |
| Comment              | Sample diluted 10ul in 0.5ml MeOH fast forward      |                   |                         |

|                              |            |                       |           |
|------------------------------|------------|-----------------------|-----------|
| <b>Acquisition Parameter</b> |            |                       |           |
| Source Type                  | ESI        | Ion Polarity          | Positive  |
| Focus                        | Not active | Set Capillary         | 4500 V    |
| Scan Begin                   | 50 m/z     | Set End Plate Offset  | -500 V    |
| Scan End                     | 2000 m/z   | Set Collision Cell RF | 600.0 Vpp |
|                              |            | Set Nebulizer         | 0.4 Bar   |
|                              |            | Set Dry Heater        | 180 °C    |
|                              |            | Set Dry Gas           | 4.0 l/min |
|                              |            | Set Divert Valve      | Source    |

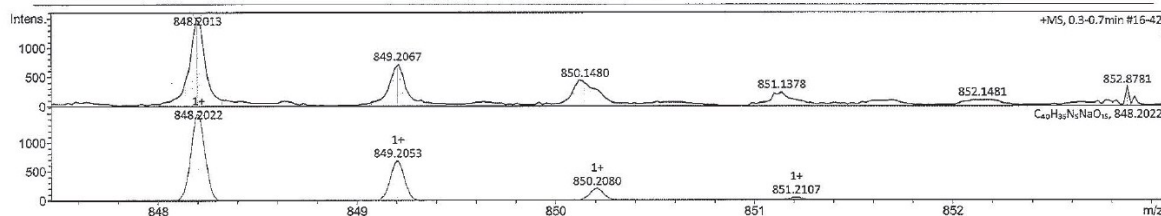

| Meas. m/z | # | Ion Formula   | m/z      | err [ppm] | mSigma | # Sigma | Score  | rdb  | e <sup>-</sup> Conf | N-Rule |
|-----------|---|---------------|----------|-----------|--------|---------|--------|------|---------------------|--------|
| 848.2013  | 1 | C40H32N8O14   | 848.2032 | -2.3      | 78.0   | 1       | 100.00 | 29.0 | odd                 | ok     |
|           | 2 | C40H22N19O5   | 848.2046 | 3.9       | 78.7   | 2       | 29.51  | 39.5 | even                | ok     |
|           | 1 | C40H32N8O14   | 848.2032 | -2.3      | 78.0   | 1       | 100.00 | 29.0 | odd                 | ok     |
|           | 2 | C40H22N19O5   | 848.2046 | 3.9       | 78.7   | 2       | 29.51  | 39.5 | even                | ok     |
|           | 1 | C40H32N8O14   | 848.2032 | -2.3      | 78.0   | 1       | 100.00 | 29.0 | odd                 | ok     |
|           | 2 | C40H22N19O5   | 848.2046 | 3.9       | 78.7   | 2       | 29.51  | 39.5 | even                | ok     |
|           | 1 | C40H35N5NaO15 | 848.2022 | -1.1      | 79.5   | 1       | 100.00 | 25.5 | even                | ok     |
|           | 2 | C40H25N16NaO6 | 848.2035 | -2.6      | 79.5   | 2       | 40.46  | 36.0 | odd                 | ok     |

Fig S24 ESI-MS of 2

## Auckland Uni Mass Spectrum SmartFormula Report

|                      |                                                           |                   |                         |  |
|----------------------|-----------------------------------------------------------|-------------------|-------------------------|--|
| <b>Analysis Info</b> |                                                           | Acquisition Date  | 1/29/2015 11:55:13 AM   |  |
| Analysis Name        | C:\Bruker\Data\Tony15\Tony01\15-01-29\seong000001.d       | Operator          | Tony                    |  |
| Method               | May2014 Wide.m                                            | Instrument / Ser# | microTOF-Q 228888.10191 |  |
| Sample Name          | seong 190                                                 |                   |                         |  |
| Comment              | Sample dissolved in MeCN @ 0.01mg/ml neat sample injected |                   |                         |  |

|                              |            |                       |           |                  |           |
|------------------------------|------------|-----------------------|-----------|------------------|-----------|
| <b>Acquisition Parameter</b> |            |                       |           |                  |           |
| Source Type                  | ESI        | Ion Polarity          | Positive  | Set Nebulizer    | 0.4 Bar   |
| Focus                        | Not active | Set Capillary         | 4500 V    | Set Dry Heater   | 180 °C    |
| Scan Begin                   | 50 m/z     | Set End Plate Offset  | -500 V    | Set Dry Gas      | 4.0 l/min |
| Scan End                     | 2000 m/z   | Set Collision Cell RF | 600.0 Vpp | Set Divert Valve | Source    |

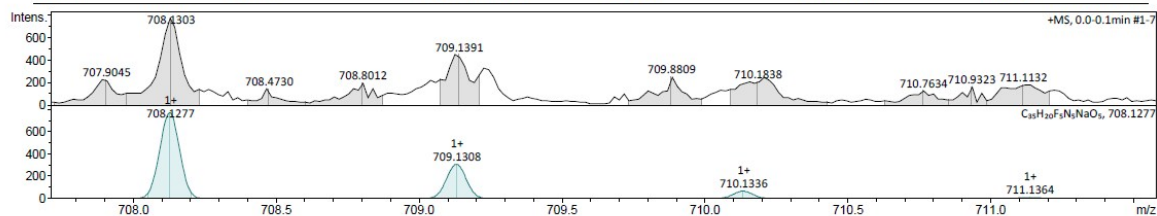

| Meas. m/z | # | Ion Formula    | m/z      | err [ppm] | mSigma | # Sigma | Score  | rdb   | e <sup>-</sup> Conf | N-Rule |
|-----------|---|----------------|----------|-----------|--------|---------|--------|-------|---------------------|--------|
| 708.1303  | 1 | C35H17F5N8O4   | 708.1287 | 2.1       | 164.8  | 1       | 100.00 | 29.0  | odd                 | ok     |
|           | 2 | C35H146F5NO2   | 708.1268 | -4.9      | 171.1  | 2       | 12.20  | -39.0 | odd                 | ok     |
|           | 1 | C35H17F5N8O4   | 708.1287 | 2.1       | 164.8  | 1       | 100.00 | 29.0  | odd                 | ok     |
|           | 2 | C35H146F5NO2   | 708.1268 | -4.9      | 171.1  | 2       | 12.20  | -39.0 | odd                 | ok     |
|           | 1 | C35H20F5N5NaO5 | 708.1277 | 3.6       | 168.1  | 1       | 100.00 | 25.5  | even                | ok     |

Fig S25 ESI-MS of **3**

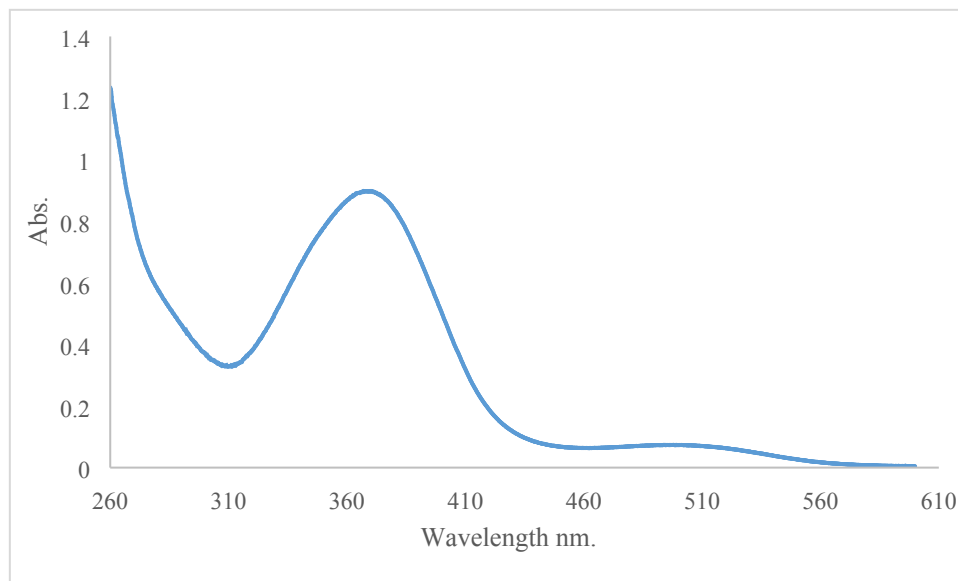

Fig S26 UV-Vis spectrum of **8** ( $2.7 \times 10^{-4}$  mol.L<sup>-1</sup> in DMSO)

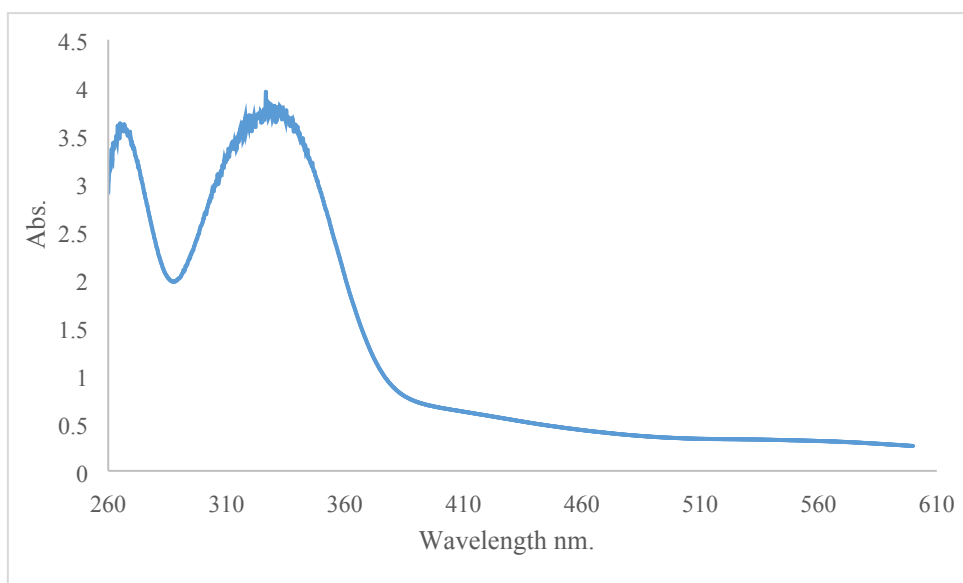

Fig S27 UV-Vis spectrum of **11** ( $9.1 \times 10^{-4}$  mol.L<sup>-1</sup> in DMSO)

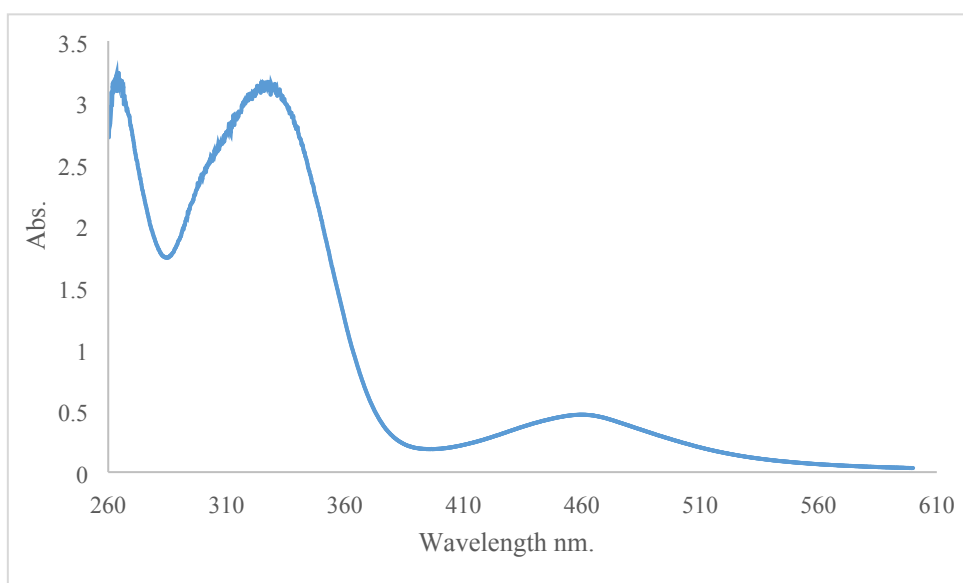

Fig S28 UV-Vis spectrum of **12** ( $9.7 \times 10^{-4}$  mol.L<sup>-1</sup> in DMSO)



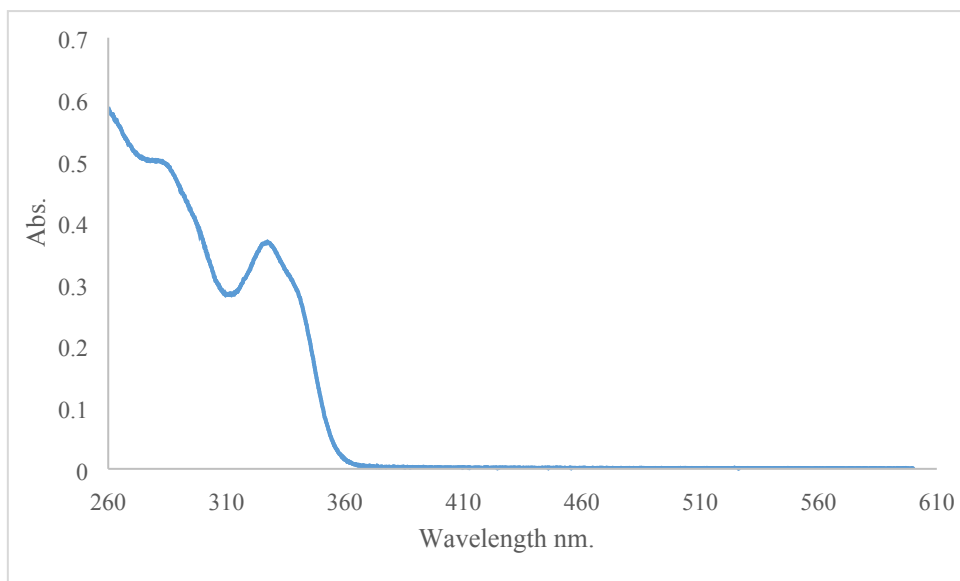

Fig S29 UV-Vis spectrum of **1** ( $2.6 \times 10^{-5}$  mol.L<sup>-1</sup> in DMSO)

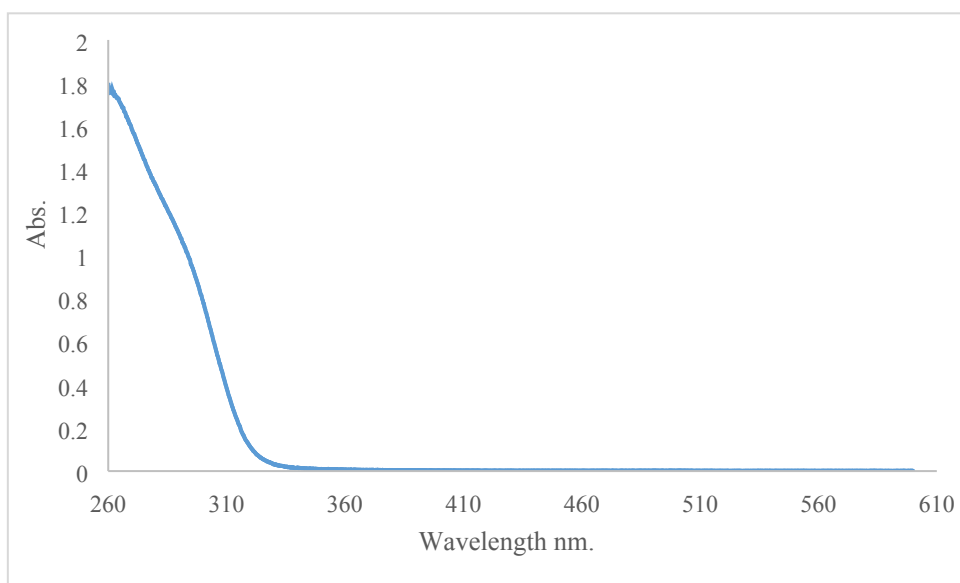

Fig S30 UV-Vis spectrum of **3** ( $7.3 \times 10^{-5}$  mol.L<sup>-1</sup> in DMSO)

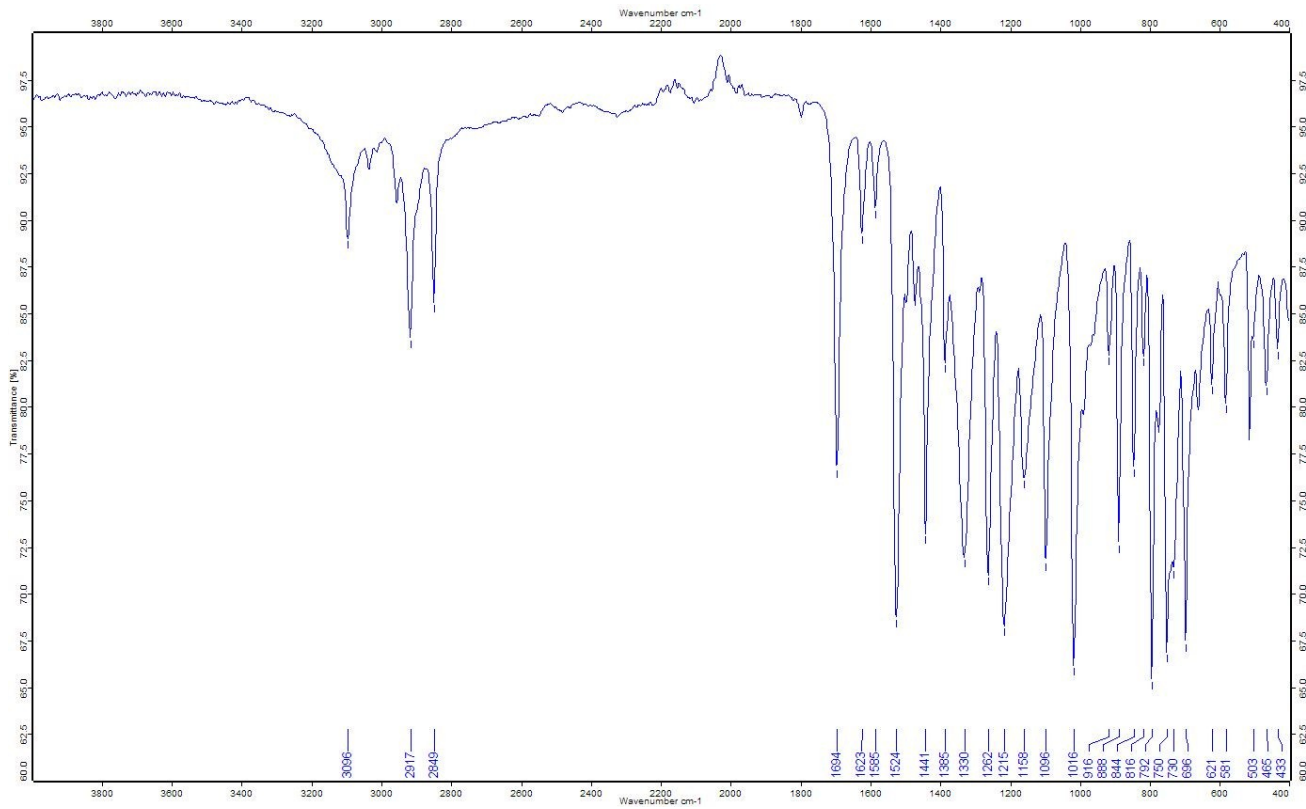

Fig S31 IR spectrum of **8**

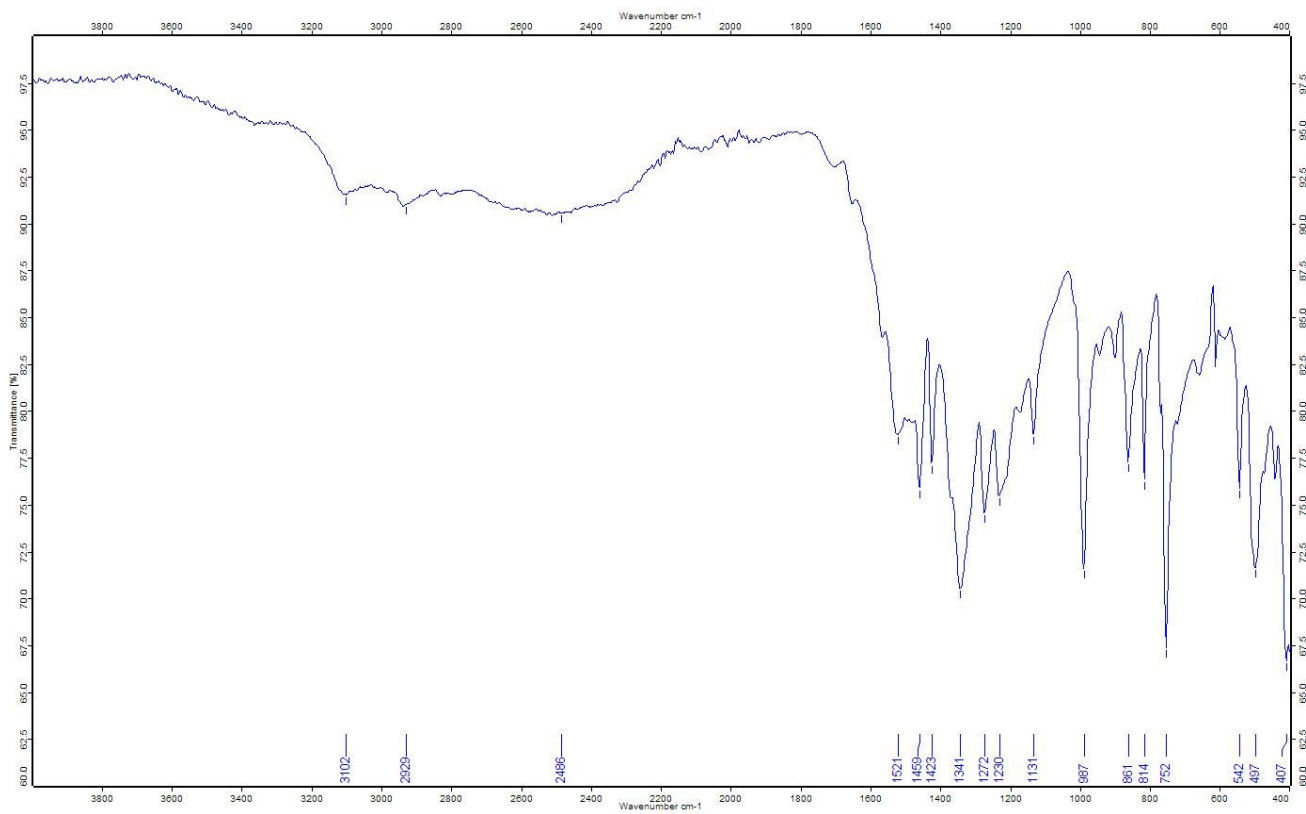

Fig S32 IR spectrum of **11**

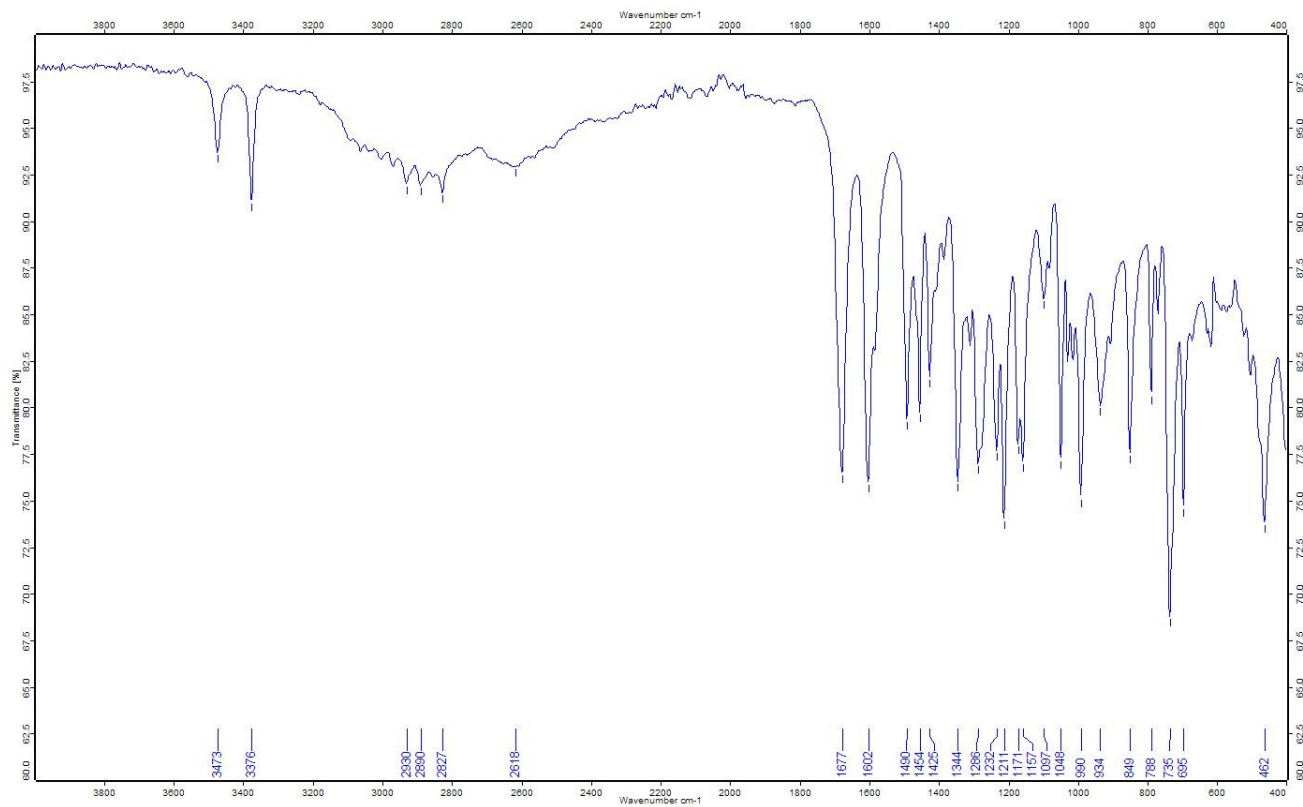

Fig S33 IR spectrum of **12**

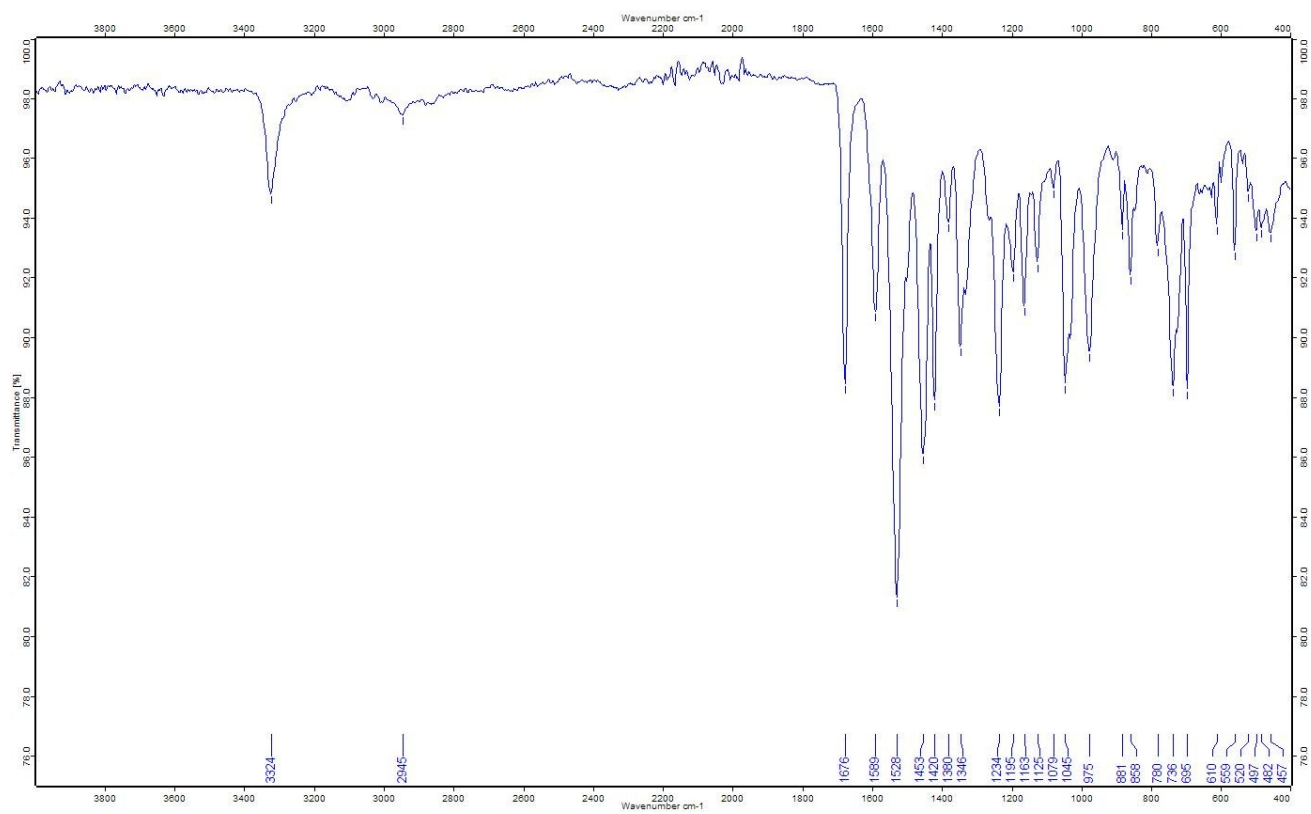

Fig S34 IR spectrum of **1**

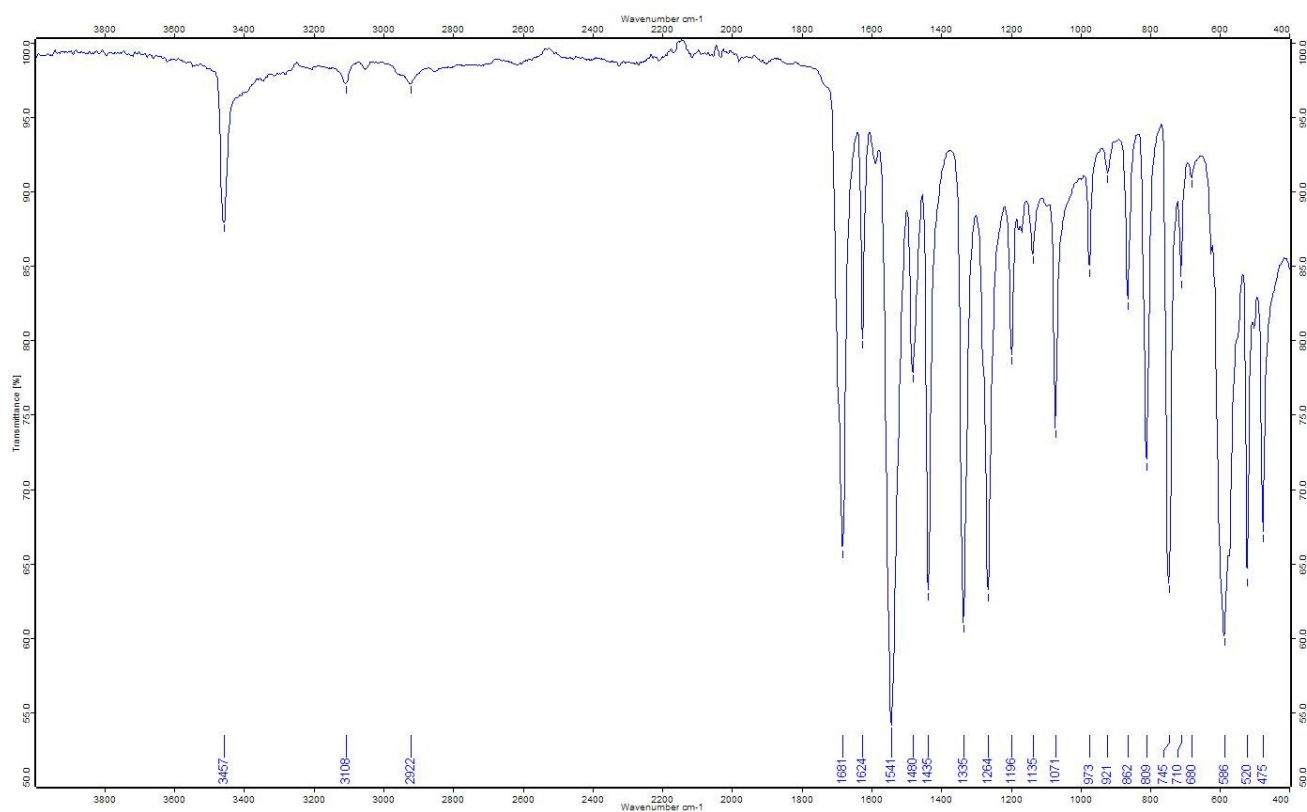

Fig S35 IR spectrum of **3**

## References

1. B. Qin, C. Sun, Y. Liu, J. Shen, R. Ye, J. Zhu, X.-F. Duan and H. Zeng, *Org. Lett.*, 2011, **13**, 2270-2273.
2. B. Qin, X. Chen, X. Fang, Y. Shu, Y. K. Yip, Y. Yan, S. Pan, W. Q. Ong, C. Ren, H. Su and H. Zeng, *Org. Lett.*, 2008, **10**, 5127-5130.
